# Supplementary material for: Nuclear and Mitochondrial Phylogenomics of the Sifakas Reveal Cryptic Variation in the Diademed Sifaka
Source: Genes (Basel). 2022 Jun 7;13(6):1026. doi: 10.3390/genes13061026 (PMC9223071; doi:10.3390/genes13061026)
Supplement: Supplementary file 1 [file genes-13-01026-s001.zip]

Archive with 9 entries (9 files):
- figure.pdf
- Supplementary Table S1_SifPhy_corrected_CAB.xlsx
- Supplementary Table S2_AdapterCombosUCEs corrected CAB.xlsx
- Supplementary Table S3 Model Parameters.xlsx
- Supplementary Table S4_UCEcounts.xlsx
- Supplementary Table S5_BioclimVars.xlsx
- Supplementary Table S6_WMG Coverage.xlsx
- Supplementary Table S7(foremelyTS6)_WMG_pairwiseDistances.csv
- Supplementary Table S8_ModelParamsENM.xlsx
