# Supplementary material for: Nuclear and Mitochondrial Phylogenomics of the Sifakas Reveal Cryptic Variation in the Diademed Sifaka
Source: Genes (Basel). 2022 Jun 7;13(6):1026. doi: 10.3390/genes13061026 (PMC9223071; doi:10.3390/genes13061026)
Supplement: Supplementary file 1 [file genes-13-01026-s001.zip › figure.pdf]

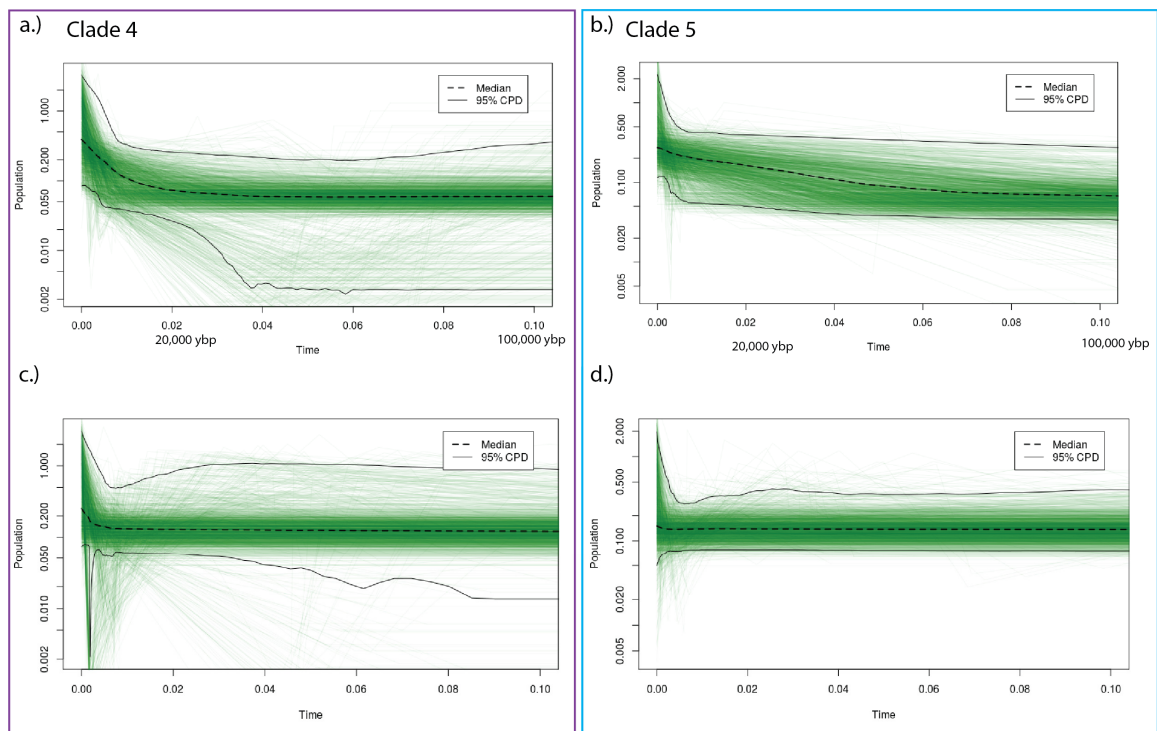

Supplementary Figure S1: Extended Bayesian Skyline Plot.

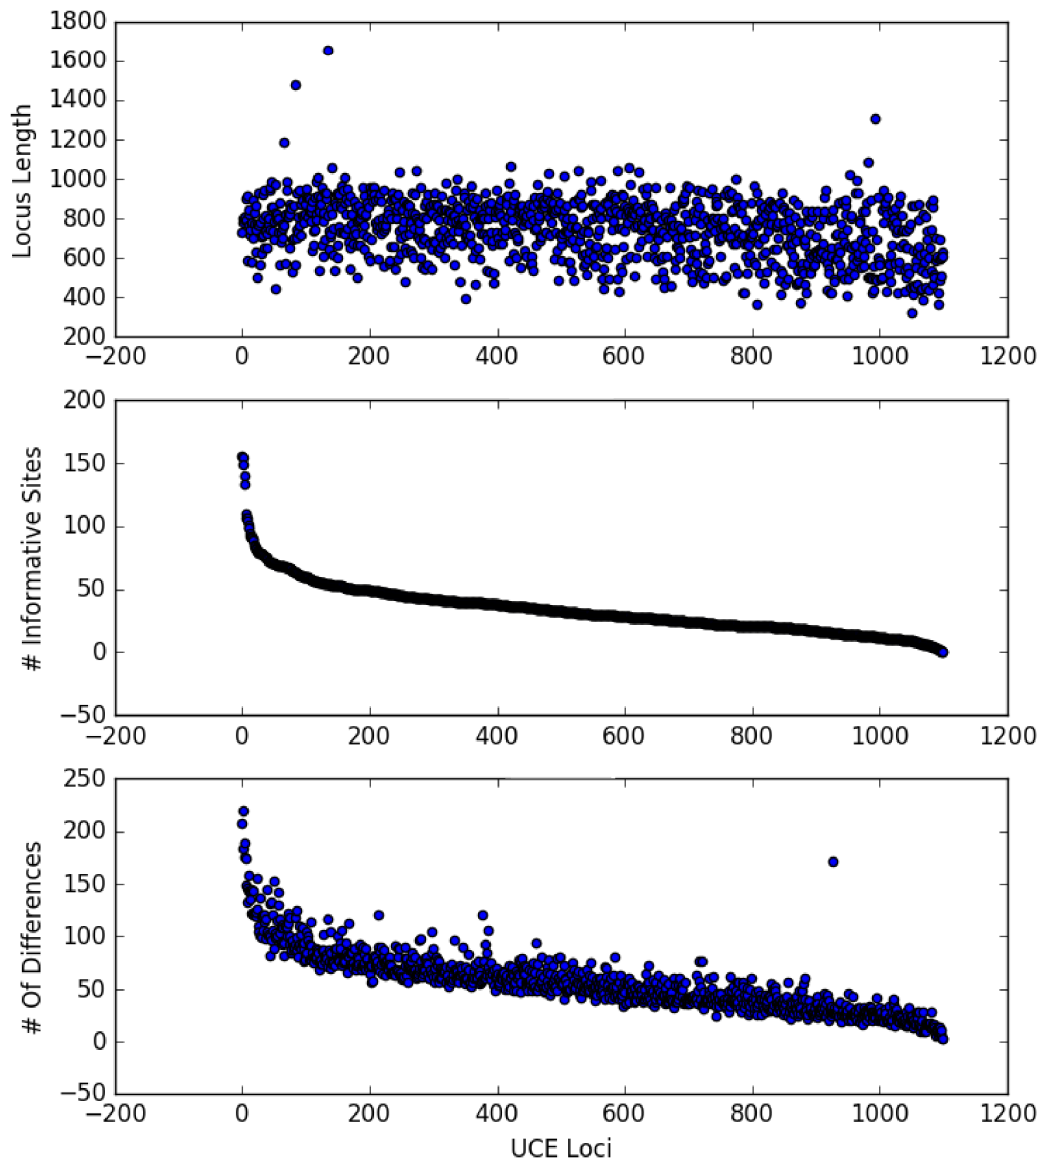

Supplementary Figure S2: 'Get informative sites' results plotted from all enriched UCEs. The script is available as part of the phyluce pipeline [49].

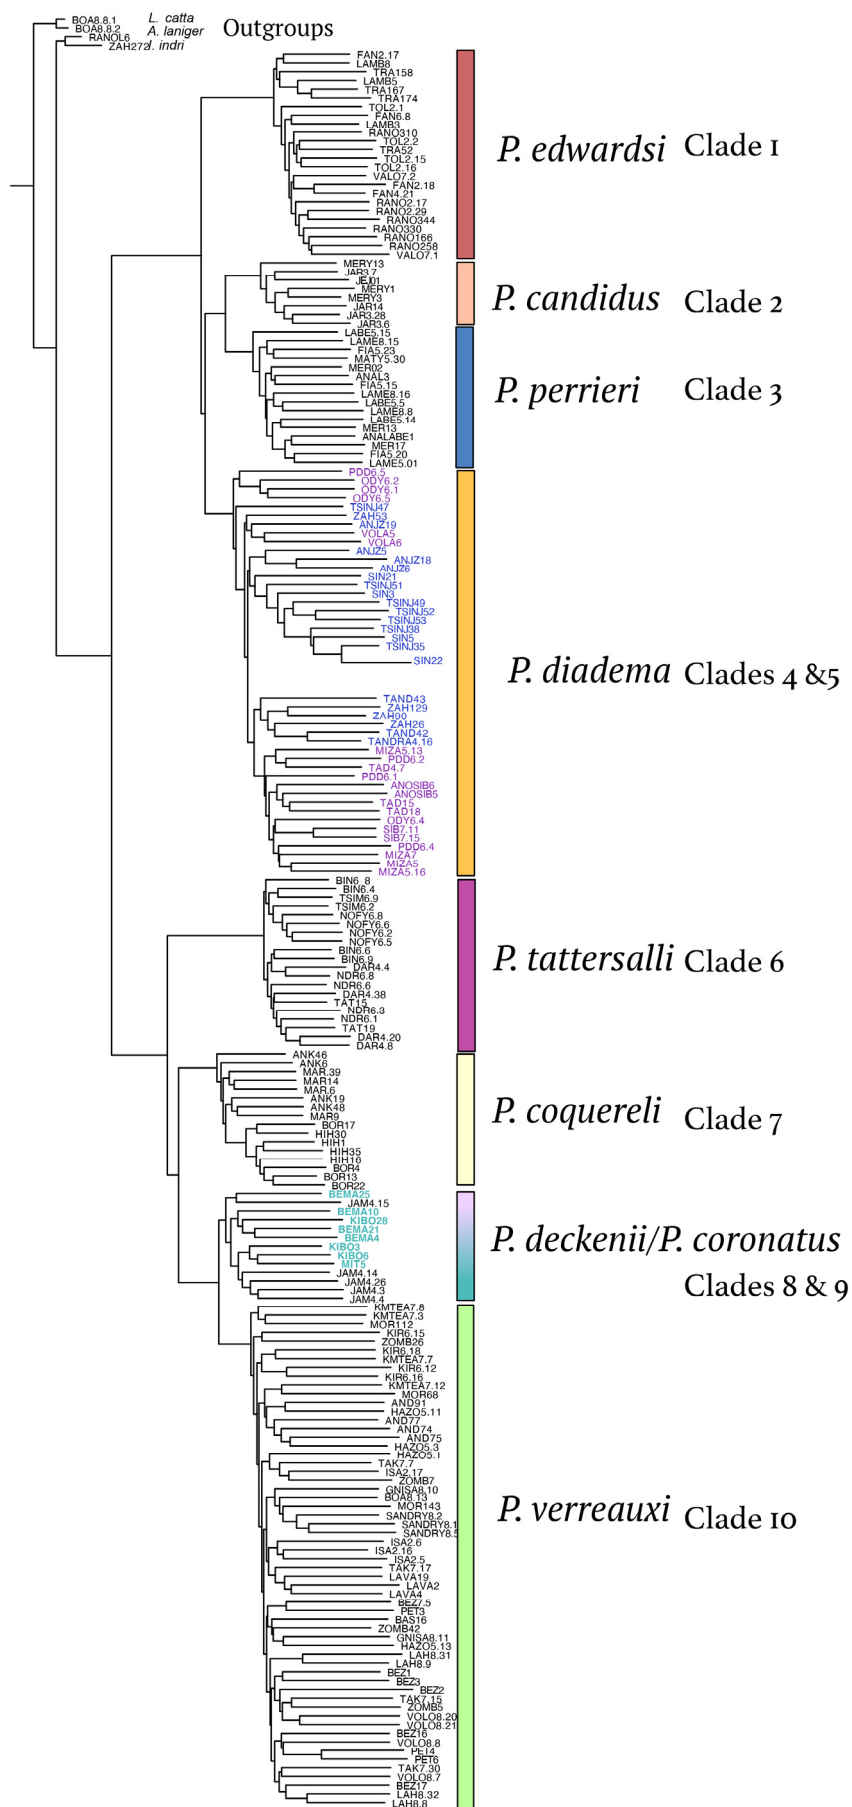

Supplementary Figure S3: NJst species tree reconstruction from 512 UCE loci. Note the topology shows admixture between the *P. coronatus* and *P. deckenii* (clades 8 and 9 in Figures 1–3) where teal individual names represent *P. deckenii* and black text represent *P. coronatus*, as well as between the two *P. diadema* clades (#'s 4 and 5). Individuals are colored by the respective clades (light and dark orange) as completed in all figures. The apparent admixture between in *P. diadema* may be due to missing data in the sequence matrix.

*Propithecus diadema* clade 4

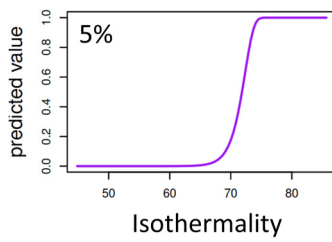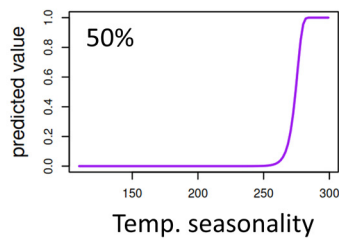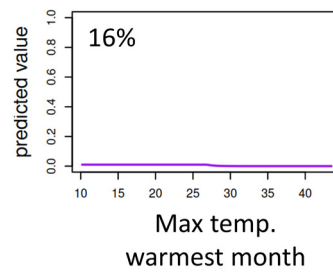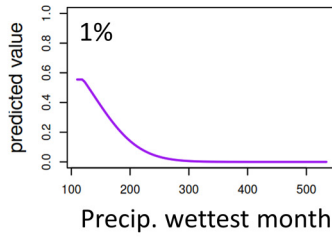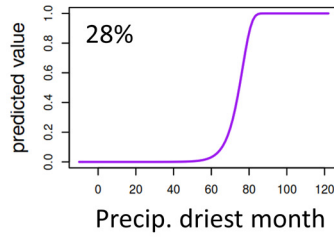

*Propithecus diadema* clade 5

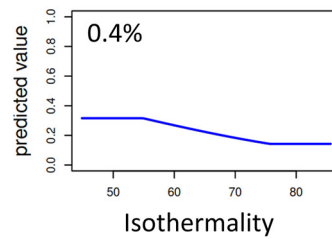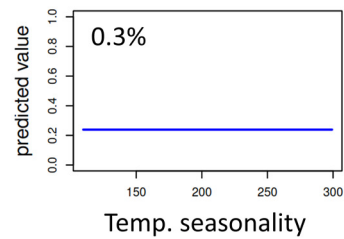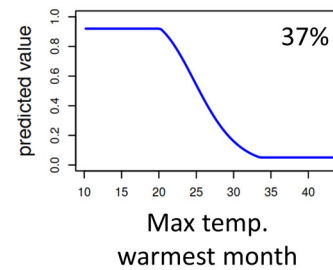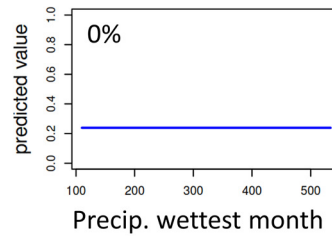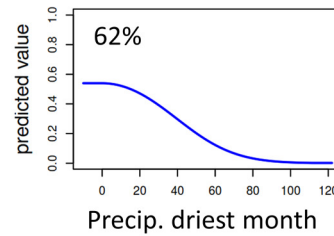

*Propithecus edwardsi*

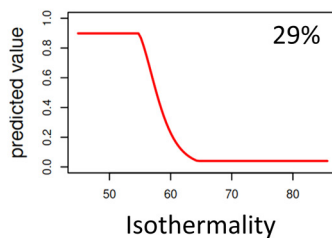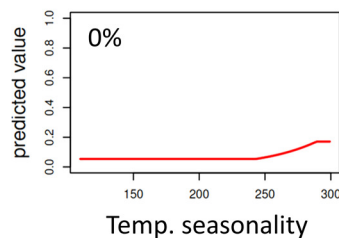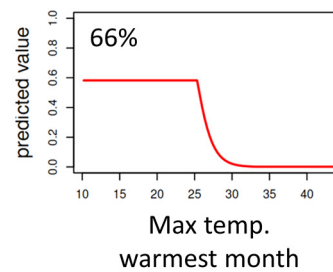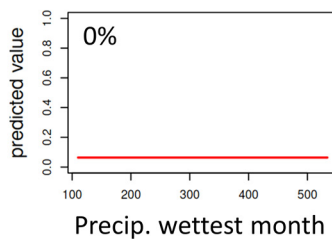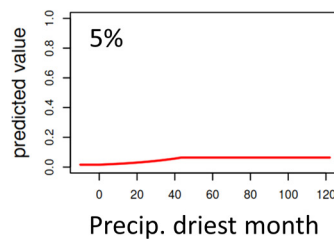

Supplementary Figure S4: Marginal response curves for *P. diadema* clades 4 and 5 and *P. edwardsi* to each variable used in constructing their ecological niche models. The percentages indicate that variable's contribution to the overall niche model.
