# Supplementary material for: Nuclear and Mitochondrial Phylogenomics of the Sifakas Reveal Cryptic Variation in the Diademed Sifaka
Source: Genes (Basel). 2022 Jun 7;13(6):1026. doi: 10.3390/genes13061026 (PMC9223071; doi:10.3390/genes13061026)
Supplement: Supplementary file 1 [file genes-13-01026-s001.zip › Supplementary Table S1_SifPhy_corrected_CAB.xlsx]

## Sheet: Sheet1
Supplementary Table S1: List of all individuals included in this study and GPS of each general lo-cation.
#	Sample ID	Species	Sex	Location	Removed	GPS
						Latitude	Longitude
1	JAR3.28	P. candidus	F	Anjanaharibe-Sud Special Reserve		-14.7953	49.4756
2	JAR14	P. candidus	F	Anjanaharibe-Sud Special Reserve		-14.7833	49.4793
3	JAR3.6	P. candidus	M	Anjanaharibe-Sud Special Reserve		-14.7993	49.4718
4	JAR3.7	P. candidus	F	Anjanaharibe-Sud Special Reserve		-14.7993	49.4718
5	MERY1	P. candidus	M	Marojejy National Park		-14.44	49.7658
6	JEJ1 (JEJ01)	P. candidus	F	Marojejy National Park		-14.4389	49.7667
7	MERY13	P. candidus	F	Marojejy National Park		-14.4348	49.7609
8	MERY3	P. candidus	M	Marojejy National Park		-14.44	49.7658
9	HIH1	P. coquereli	F	Anjiamangirana Forest		-15.1562	47.7426
10	HIH30	P. coquereli	F	Anjiamangirana Forest		-15.1595	47.7303
11	HIH35	P. coquereli	M	Anjiamangirana Forest		-15.1568	47.7329
12	HIH16	P. coquereli	M	Anjiamangirana Forest		-15.1582	47.7256
13	ANK6	P. coquereli	F	Ankarafantsika National Park		-12.9162	49.1
14	ANK46	P. coquereli	F	Ankarafantsika National Park		-16.35	46.75
15	ANK19	P. coquereli	M	Ankarafantsika National Park		-16.35	46.75
16	ANK48	P. coquereli	M	Ankarafantsika National Park		-16.35	46.75
17	BOR4	P. coquereli	F	Bora Forest		-14.85	48.1833
18	BOR13	P. coquereli	M	Bora Forest		-14.8784	48.2
19	BOR22	P. coquereli	M	Bora Forest		-14.8831	48.2
20	BOR17	P. coquereli	F	Bora Forest		-14.8831	48.2
21	MAR9	P. coquereli	F	Maraiano Forest		-15.4778	46.6894
22	MAR14	P. coquereli	M	Maraiano Forest		-15.4753	46.6896
23	MAR6	P. coquereli	F	Maraiano Forest		-15.4787	46.6902
24	MAR39	P. coquereli	M	Maraiano Forest		-15.4841	46.6922
25	JAM4.3	P. coronatus	F	Anjahamena Forest		-16.0377	45.9171
26	JAM4.14	P. coronatus	F	Anjahamena Forest		-16.0394	45.912
27	JAM4.19	P. coronatus	F	Anjahamena Forest	Yes	-16.0463	45.9145
28	JAM4.15	P. coronatus	M	Anjahamena Forest		-16.0394	45.912
29	JAM4.26	P. coronatus	M	Anjahamena Forest		-16.0358	45.9204
30	JAM4.4	P. coronatus	M	Anjahamena Forest		-16.0377	45.9171
31	BEMA4	P. deckenii	F	Tsingy de Bemaraha National Park		-19.0167	44.7802
32	BEMA10	P. deckenii	M	Tsingy de Bemaraha National Park		-19.0167	44.7795
33	BEMA25	P. deckenii	F	Tsingy de Bemaraha National Park		-19.0167	44.7744
34	BEMA21	P. deckenii	M	Tsingy de Bemaraha National Park		-19.0167	44.7744
35	KIBO3	P. deckenii	F	Tsiombikibo Forest (Analamanitra)		-16.0403	45.8028
36	KIBO6	P. deckenii	M	Tsiombikibo Forest (Analamanitra)		-16.0494	45.8031
37	MIT5	P. deckenii	F	Tsiombikibo Forest (Analamanitra)		-16.0167	45.8355
38	KIBO28	P. deckenii	M	Tsiombikibo Forest (Analamanitra)		-16.042	45.8057
39	PDD6.1	P. diadema	F	Mantadia National Park		-18.816	48.4222
40	PDD6.5	P. diadema	F	Mantadia National Park		-18.8157	48.4258
41	PDD6.4	P. diadema	M	Mantadia National Park		-18.8172	48.421
42	PDD6.2	P. diadema	M	Mantadia National Park		-18.8178	48.424
43	ANJZ18	P. diadema	M	Anjozorobe-Angavo Protected Area (Amboasary An'ala)		-18.4666	47.9568
44	ANJZ5	P. diadema	F	Anjozorobe-Angavo Protected Area (Amboasary An'ala)		-18.4583	47.955
45	ANJZ6	P. diadema	F	Anjozorobe-Angavo Protected Area (Amboasary An'ala)		-18.4583	47.955
46	ANJZ19	P. diadema	M	Anjozorobe-Angavo Protected Area (Amboasary An'ala)		-18.4666	47.9568
47	ANOSIB6	P. diadema	F	Anosibe An'Ala Forest		-19.2167	48.2667
48	ANOSIB5	P. diadema	M	Anosibe An'Ala Forest		-19.2167	48.2667
49	SIB7.15	P. diadema	F	Anosibe An'Ala Forest		-19.2473	48.2436
50	SIB7.11	P. diadema	M	Anosibe An'Ala Forest		-19.2458	48.2438
51	VOLA5	P. diadema	F	Mangerivola Special Reserve		-18.2365	48.9076
52	VOLA6	P. diadema	M	Mangerivola Special Reserve		-18.2365	48.9076
53	TAD4.7	P. diadema	F	Mantadia National Park		-18.8	48.4167
54	TAD4.14	P. diadema	M	Mantadia National Park		-18.8171	48.4256
55	TAD15	P. diadema	M	Mantadia National Park		-18.8136	48.4299
56	TAD18	P. diadema	F	Mantadia National Park		-18.8136	48.4299
57	MIZA5	P. diadema	F	Maromizaha Natural Resource Reserve		-18.9879	48.4626
58	MIZA7	P. diadema	M	Maromizaha Natural Resource Reserve		-18.9743	48.4616
59	MIZA5.16	P. diadema	M	Maromizaha Natural Resource Reserve		-18.9828	48.4619
60	MIZA5.13	P. diadema	F	Maromizaha Natural Resource Reserve		-18.9763	48.4619
61	TANDRA4.16	P. diadema	F	Marotandrano Special Reserve		-16.2824	48.8059
62	TAND43	P. diadema	F	Marotandrano Special Reserve		-16.269	48.819
63	TAND42	P. diadema	M	Marotandrano Special Reserve		-16.269	48.819
64	ODY6.4	P. diadema	F	Sahanody Forest		-18.8562	48.4202
65	ODY6.2	P. diadema	M	Sahanody Forest		-18.8556	48.4216
66	ODY6.5	P. diadema	F	Sahanody Forest		-18.8553	48.4218
67	ODY6.1	P. diadema	F	Sahanody Forest		-18.8568	48.4211
68	TSINJ52	P. diadema	F	Tsinjoarivo Forest		-19.6994	47.75
69	SIN3	P. diadema	M	Tsinjoarivo Forest		-19.69	47.75
70	SIN11	P. diadema	F	Tsinjoarivo Forest		-19.6983	47.7725
71	SIN5	P. diadema	M	Tsinjoarivo Forest		-19.6667	47.7333
72	SIN21	P. diadema	F	Tsinjoarivo Forest		-19.6848	47.7598
73	SIN22	P. diadema	M	Tsinjoarivo Forest		-19.6848	47.7598
74	TSINJ31	P. diadema	F	Tsinjoarivo Forest		-19.6906	47.7722
75	TSINJ49	P. diadema	M	Tsinjoarivo Forest		-19.6967	47.7632
76	TSINJ32	P. diadema	F	Tsinjoarivo Forest		-19.6906	47.7722
77	TSINJ35	P. diadema	F	Tsinjoarivo Forest		-19.6906	47.7722
78	TSINJ38	P. diadema	M	Tsinjoarivo Forest		-19.6906	47.7722
79	TSINJ47	P. diadema	F	Tsinjoarivo Forest		-19.6908	47.7888
80	TSINJ53	P. diadema	M	Tsinjoarivo Forest		-19.6994	47.75
81	TSINJ51	P. diadema	F	Tsinjoarivo Forest		-19.6994	47.75
82	ZAH26	P. diadema	M	Zahamena National Park		-17.4892	48.7472
83	ZAH129	P. diadema	M	Zahamena National Park		-17.4892	48.7472
84	ZAH53	P. diadema	F	Zahamena National Park		-17.4892	48.7472
85	ZAH90	P. diadema	F	Zahamena National Park		-17.4892	48.7472
86	TRA52	P. edwardsi	F	Andringitra National Park		-22.2226	47.0211
87	TRA167	P. edwardsi	F	Andringitra National Park		-22.2226	47.0211
88	TRA158	P. edwardsi	M	Andringitra National Park		-22.2226	47.0211
89	TRA174	P. edwardsi	M	Andringitra National Park		-22.2226	47.0211
90	FAN2.17	P. edwardsi	M	Fandriana Forest		-20.354	47.55
91	FAN2.18	P. edwardsi	F	Fandriana Forest		-20.354	47.55
92	FAN4.21	P. edwardsi	F	Fandriana Forest		-20.4213	47.6085
93	FAN6.8	P. edwardsi	F	Fandriana Forest		-20.3522	47.5633
94	LAMB5	P. edwardsi	F	Marolambo National Park		-19.8861	47.7506
95	LAMB3	P. edwardsi	F	Marolambo National Park		-19.9136	47.756
96	LAMB8	P. edwardsi	M	Marolambo National Park		-19.8866	47.749
97	RANO330	P. edwardsi	F	Ranomafana National Park		-21.2287	47.35
98	RANO258	P. edwardsi	M	Ranomafana National Park		-21.2333	47.4241
99	RANO2.29	P. edwardsi	M	Ranomafana National Park		-21.2333	47.4189
100	RANO2.17	P. edwardsi	F	Ranomafana National Park		-21.2333	47.4
101	TOL2.1	P. edwardsi	M	Tolongoina Forest		-21.5107	47.4128
102	TOL2.2	P. edwardsi	M	Tolongoina Forest		-21.5107	47.4128
103	TOL2.15	P. edwardsi	F	Tolongoina Forest		-21.5092	47.4089
104	TOL2.16	P. edwardsi	M	Tolongoina Forest		-21.5092	47.4089
105	VALO7.2	P. edwardsi	M	Ranomafana National Park (Valohoaka)		-21.2843	47.4301
106	VALO7.1	P. edwardsi	F	Ranomafana National Park (Valohoaka)		-21.2843	47.4301
107	RANO166	P. edwardsi	F	Ranomafana National Park (Vatoharanana)		-21.2333	47.4241
108	RANO310	P. edwardsi	M	Ranomafana National Park (Vatoharanana)		-21.2917	47.4167
109	RANO341	P. edwardsi	F	Ranomafana National Park (Vohiparara)		-21.2287	47.35
110	RANO344	P. edwardsi	M	Ranomafana National Park (Vohiparara)		-21.2287	47.35
111	MATY5.30	P. perrieri	F	Analamerana Special Reserve (Ampasimaty)		-12.7625	49.4721
112	LABE5.14	P. perrieri	F	Analamerana Special Reserve (Analabe)		-12.7543	49.5032
113	ANALABE1	P. perrieri	F	Analamerana Special Reserve (Analabe)		-12.7612	49.5104
114	LABE5.5	P. perrieri	M	Analamerana Special Reserve (Analabe)		-12.7475	49.4923
115	LABE5.15	P. perrieri	M	Analamerana Special Reserve (Analabe)		-12.7615	49.5122
116	LAME5.01	P. perrieri	F	Analamerana Special Reserve (Ankavanana)		-12.8012	49.3702
117	LAME8.15	P. perrieri	F	Analamerana Special Reserve (Ankavanana)		-12.7785	49.3879
118	LAME8.8	P. perrieri	M	Analamerana Special Reserve (Ankavanana)		-12.8014	49.3703
119	LAME8.16	P. perrieri	M	Analamerana Special Reserve (Ankavanana)		-12.7781	49.3878
120	ANAL3	P. perrieri	F	Analamerana Special Reserve (Antobiratsy)		-12.8162	49.5167
121	MER13	P. perrieri	M	Analamerana Special Reserve (Antobiratsy)		-12.8136	49.5167
122	MER02	P. perrieri	F	Analamerana Special Reserve (Antobiratsy)		-12.8136	49.5167
123	MER17	P. perrieri	M	Analamerana Special Reserve (Antobiratsy)		-12.8136	49.5167
124	FIA5.15	P. perrieri	M	Andrafiamena Andavakoera Protected Area (Anjakely)		-12.9024	49.3371
125	FIA5.23	P. perrieri	F	Andrafiamena Andavakoera Protected Area (Anjakely)		-12.9147	49.3274
126	FIA5.27	P. perrieri	F	Andrafiamena Andavakoera Protected Area (Anjakely)		-12.9126	49.3244
127	FIA5.20	P. perrieri	M	Andrafiamena Andavakoera Protected Area (Anjakely)		-12.9217	49.3258
128	NDR6.1	P. tattersalli	F	Andranotsimaty Forest		-13.1656	49.6986
129	NDR6.8	P. tattersalli	F	Andranotsimaty Forest		-13.1621	49.6951
130	NDR6.3	P. tattersalli	M	Andranotsimaty Forest		-13.1656	49.6986
131	NDR6.6	P. tattersalli	M	Andranotsimaty Forest		-13.1621	49.6951
132	TSIM6.9	P. tattersalli	F	Antobinitsimihety Forest		-12.9775	49.5549
133	TSIM6.2	P. tattersalli	M	Antobinitsimihety Forest		-12.9775	49.5529
134	TSIM6.5	P. tattersalli	M	Antobinitsimihety Forest		-12.9815	49.5486
135	BIN6.8	P. tattersalli	F	Binara Forest		-13.2551	49.6215
136	BIN6.9	P. tattersalli	F	Binara Forest		-13.2551	49.6215
137	BIN6.4	P. tattersalli	M	Binara Forest	Yes	-13.2716	49.6225
138	BIN6.6	P. tattersalli	M	Binara Forest	Yes	-13.2716	49.6225
139	TAT14	P. tattersalli	M	Bobankora Forest		-13.2167	49.7579
140	TAT16	P. tattersalli	M	Bobankora Forest		-13.2167	49.7579
141	TAT15	P. tattersalli	F	Bobankora Forest		-13.2167	49.7579
142	TAT19	P. tattersalli	F	Bobankora Forest		-13.2167	49.7579
143	DAR4.20	P. tattersalli	F	Daraina (Matamena Forest)		-13.1487	49.7064
144	DAR4.8	P. tattersalli	M	Daraina (Matamena Forest)		-13.1489	49.7062
145	DAR4.4	P. tattersalli	F	Daraina (Matamena Forest)		-13.1516	49.7068
146	DAR4.38	P. tattersalli	M	Daraina (Matamena Forest)		-13.1462	49.7047
147	NOFY6.5	P. tattersalli	M	Mahabenofy Forest		-13.0453	49.4568
148	NOFY6.8	P. tattersalli	M	Mahabenofy Forest		-13.0489	49.4509
149	NOFY6.2	P. tattersalli	F	Mahabenofy Forest		-13.0382	49.4651
150	NOFY6.6	P. tattersalli	F	Mahabenofy Forest		-13.0453	49.4568
151	LAVA19	P. verreauxi	F	Analalava Forest		-22.589	45.1167
152	LAVA2	P. verreauxi	M	Analalava Forest		-22.5833	45.1706
153	LAVA4	P. verreauxi	M	Analalava Forest		-22.5833	45.1706
154	AND74	P. verreauxi	F	Andohahela National Park		-24.9487	46.5537
155	AND77	P. verreauxi	F	Andohahela National Park		-24.9487	46.5537
156	AND75	P. verreauxi	M	Andohahela National Park		-24.9487	46.5537
157	AND91	P. verreauxi	M	Andohahela National Park		-24.9651	46.5591
158	HAZO5.3	P. verreauxi	M	Andohahela National Park (Ihazofotsy)		-24.8261	46.5412
159	HAZO5.11	P. verreauxi	F	Andohahela National Park (Ihazofotsy)		-24.8314	46.5396
160	HAZO5.1	P. verreauxi	F	Andohahela National Park (Ihazofotsy)		-24.8261	46.5412
161	HAZO5.13	P. verreauxi	M	Andohahela National Park (Ihazofotsy)		-24.8167	46.5461
162	BOA8.13	P. verreauxi	F	Ankaboa Forest		-25.1655	44.5615
163	GNISA8.10	P. verreauxi	M	Ankilelignisa Forest		-25.0256	44.3856
164	GNISA8.11	P. verreauxi	M	Ankilelignisa Forest		-25.0256	44.3856
165	MOR143	P. verreauxi	F	Menabe Antimena Protected Area (Beroboka)		-19.9833	44.65
166	MOR68	P. verreauxi	M	Menabe Antimena Protected Area (Beroboka)		-19.9833	44.65
167	MOR112	P. verreauxi	M	Menabe Antimena Protected Area (Beroboka)		-19.9833	44.65
168	BEZ1	P. verreauxi	F	Bezà-Mahafaly Special Reserve		-23.6585	44.6167
169	BEZ7.5	P. verreauxi	F	Bezà-Mahafaly Special Reserve		-23.6931	44.6074
170	BEZ16	P. verreauxi	F	Bezà-Mahafaly Special Reserve		-23.6578	44.6167
171	BEZ17	P. verreauxi	F	Bezà-Mahafaly Special Reserve		-23.6578	44.6167
172	BEZ2	P. verreauxi	M	Bezà-Mahafaly Special Reserve		-23.6575	44.6167
173	BEZ3	P. verreauxi	F	Bezà-Mahafaly Special Reserve		-23.6578	44.6167
174	TAK7.15	P. verreauxi	F	Ifotaka Forest		-24.7597	46.169
175	TAK7.30	P. verreauxi	F	Ifotaka Forest		-24.7063	46.0866
176	TAK7.17	P. verreauxi	M	Ifotaka Forest		-24.7597	46.169
177	TAK7.7	P. verreauxi	M	Ifotaka Forest		-24.759	46.1547
178	ISA2.5	P. verreauxi	F	Isalo National Park		-22.3	45.2833
179	ISA2.6	P. verreauxi	M	Isalo National Park		-22.3	45.2833
180	ISA2.16	P. verreauxi	F	Isalo National Park		-22.3	45.3
181	ISA2.17	P. verreauxi	M	Isalo National Park		-22.3	45.3
182	KIR6.12	P. verreauxi	F	Menabe Antimena Protected Area (Kirindy)		-20.0688	44.6532
183	KIR6.15	P. verreauxi	F	Menabe Antimena Protected Area (Kirindy)		-20.0677	44.6513
184	KIR6.16	P. verreauxi	M	Menabe Antimena Protected Area (Kirindy)		-20.0677	44.6513
185	KIR6.18	P. verreauxi	M	Menabe Antimena Protected Area (Kirindy)		-20.0737	44.6416
186	KMTEA7.7	P. verreauxi	F	Kirindy Mité National Park		-20.7841	44.1723
187	KMTEA7.12	P. verreauxi	F	Kirindy Mité National Park		-20.7866	44.1694
188	KMTEA7.3	P. verreauxi	M	Kirindy Mité National Park		-20.7849	44.1758
189	KMTEA7.8	P. verreauxi	M	Kirindy Mité National Park		-20.7868	44.1738
190	VOLO8.7	P. verreauxi	F	Lavavolo Forest		-24.6429	43.9703
191	VOLO8.21	P. verreauxi	F	Lavavolo Forest		-24.6056	43.9559
192	VOLO8.8	P. verreauxi	M	Lavavolo Forest		-24.6331	43.9716
193	VOLO8.20	P. verreauxi	M	Lavavolo Forest		-24.6054	43.9564
194	LAH8.9	P. verreauxi	F	Manakaralahy Forest		-24.4817	44.583
195	LAH8.32	P. verreauxi	F	Manakaralahy Forest		-24.5067	44.5477
196	LAH8.8	P. verreauxi	M	Manakaralahy Forest		-24.4817	44.583
197	LAH8.31	P. verreauxi	M	Manakaralahy Forest		-24.5067	44.5477
198	SANDRY8.1	P. verreauxi	F	Matsandry Atsimo Forest		-25.2389	44.4931
199	SANDRY8.2	P. verreauxi	F	Matsandry Atsimo Forest		-25.2389	44.4931
200	SANDRY8.5	P. verreauxi	M	Matsandry Atsimo Forest		-25.2382	44.4916
201	PET3	P. verreauxi	F	Tsimanampesotse National Park		-24.088	43.7541
202	PET6	P. verreauxi	F	Tsimanampesotse National Park		-24.088	43.7541
203	PET4	P. verreauxi	M	Tsimanampesotse National Park		-24.088	43.7541
204	BAS16	P. verreauxi	F	Zombitse-Vohibasia National Park		-22.6144	44.8044
205	ZOMB7	P. verreauxi	F	Zombitse-Vohibasia National Park		-22.8836	44.6926
206	ZOMB42	P. verreauxi	F	Zombitse-Vohibasia National Park		-22.8789	44.6983
207	ZOMB5	P. verreauxi	M	Zombitse-Vohibasia National Park		-22.8799	44.6974
208	ZOMB26	P. verreauxi	M	Zombitse-Vohibasia National Park		-22.8804	44.6954
