# Supplementary material for: Nuclear and Mitochondrial Phylogenomics of the Sifakas Reveal Cryptic Variation in the Diademed Sifaka
Source: Genes (Basel). 2022 Jun 7;13(6):1026. doi: 10.3390/genes13061026 (PMC9223071; doi:10.3390/genes13061026)
Supplement: Supplementary file 1 [file genes-13-01026-s001.zip › Supplementary Table S2_AdapterCombosUCEs corrected CAB.xlsx]

## Sheet: Sheet1
Supplementary Table S2: Complete barcode combinations used for this project using Illumina iTru style adapters as ordered from Glenn (2016).
Enriched samples for NextSeq Sequencing		UCE Sequencing
		iTru i5 Index Name	RC for NextSeq	iTru i7 Index Name
1	RANO166	iTru5_17_A	GATACTGG	iTru7_101_01	GGTAACGT
2	ZAH26	iTru5_13_B	CGTCAATG	iTru7_101_02	CAACACAG
3	MOR143	iTru5_13_C	ACATTGCG	iTru7_101_03	ACACCTCA
4	ZAH129	iTru5_13_D	TCGTGGAT	iTru7_101_04	CATGGATC
5	MOR68	iTru5_13_E	TTCAGGAG	iTru7_101_05	TGATAGGC
6	ZAH53	iTru5_13_F	GTCATCGA	iTru7_101_06	CGGTTGTT
7	ZAH90	iTru5_13_H	TGTGAAGC	iTru7_101_08	ACCATAGG
8	BEZ2	iTru5_14_A	TGATCGGA	iTru7_101_09	GGTGTACA
9	TANDRA4.16	iTru5_14_B	TCATCACC	iTru7_101_10	CAGCATAC
10	BEZ3	iTru5_14_C	GCCTTGTT	iTru7_101_11	GGACATCA
11	TAND43	iTru5_14_D	CGAACTGT	iTru7_101_12	AGAAGGAC
12	BEZ7.5	iTru5_14_E	CAGCGATT	iTru7_102_01	CGCCTTAT
13	TAND42	iTru5_14_F	AGTGTTGG	iTru7_102_02	CAGGTAAG
14	BEZ16	iTru5_14_G	CATGTTCC	iTru7_102_03	TTGCAACG
15	TSINJ52	iTru5_14_H	AACCGAAG	iTru7_102_04	GCTGAATC
16	BEZ17	iTru5_15_A	TTAGGTCG	iTru7_102_05	GAACGTGA
17	TSINJ53	iTru5_15_B	ACACGGTT	iTru7_102_06	AACGCACA
18	PET3	iTru5_15_C	GACATGGT	iTru7_102_07	CGCAACTA
19	PET6	iTru5_15_E	GCCTATCA	iTru7_102_09	TGAGCTGT
20	TSINJ51	iTru5_15_F	CAGTGAAG	iTru7_102_10	GCCTTAAC
21	PET4	iTru5_15_G	ACATAGGC	iTru7_102_11	TGTGGCTT
22	ANOSIB6	iTru5_15_H	GATCCATG	iTru7_102_12	AACCGTGT
23	NOFY6.5	iTru5_17_B	CCTACTGA	iTru7_101_02	CAACACAG
24	ANOSIB5	iTru5_16_B	CCAATAGG	iTru7_103_02	GGTCACTA
25	ISA2.5	iTru5_16_C	GCTGGATT	iTru7_103_03	TAGTCTCG
26	SIB7.15	iTru5_16_D	ACCACGAT	iTru7_103_04	ACCATGTC
27	ISA2.6	iTru5_16_E	TGACGCAT	iTru7_103_05	AGACATGC
28	SIB7.11	iTru5_16_F	GAACATCG	iTru7_103_06	GATGGAGT
29	ISA2.16	iTru5_16_G	AGTTACGG	iTru7_103_07	CAGTCACA
30	TAD4.7	iTru5_16_H	CTGTTGAC	iTru7_103_08	GTTCTTCG
31	ISA2.17	iTru5_17_A	GATACTGG	iTru7_103_09	AAGACACC
32	TAD4.14	iTru5_17_B	CCTACTGA	iTru7_103_10	GCCTTCTT
33	LAVA19	iTru5_17_C	CGTTGCAA	iTru7_103_11	TCGAACCT
34	TAD15	iTru5_17_D	ACCTGACT	iTru7_103_12	GGAACATG
35	LAVA2	iTru5_17_E	GTATGCTG	iTru7_104_01	TATGGCAC
36	TAD18	iTru5_17_F	TAACCGGT	iTru7_104_02	CTACAAGG
37	LAVA4	iTru5_17_G	TTGATCCG	iTru7_104_03	AATCCAGC
38	VOLA5	iTru5_17_H	CCGGAATT	iTru7_104_04	CCTCGTTA
39	RANO310	iTru5_17_C	CGTTGCAA	iTru7_101_03	ACACCTCA
40	VOLA6	iTru5_18_B	ACCGCATA	iTru7_104_06	GGTATAGG
41	ZOMB7	iTru5_18_C	TCGAAGGT	iTru7_104_07	CGACCTAA
42	ANJZ18	iTru5_18_D	GGTTGATG	iTru7_104_08	GATCTTGC
43	ZOMB42	iTru5_18_E	CTGCACTT	iTru7_104_10	TCCATTGC
44	ANJZ5	iTru5_18_F	GCTGTAAG	iTru7_104_11	TACTCCAG
45	ZOMB5	iTru5_18_G	CAATGTGG	iTru7_104_12	CGATGTTC
46	ANJZ6	iTru5_18_H	TATTCGCC	iTru7_101_01	GGTAACGT
47	ZOMB26	iTru5_18_G	CAATGTGG	iTru7_101_02	CAACACAG
48	MIZA5	iTru5_18_F	GCTGTAAG	iTru7_101_03	ACACCTCA
49	BAS16	iTru5_18_E	CTGCACTT	iTru7_101_04	CATGGATC
50	ANJZ19	iTru5_18_D	GGTTGATG	iTru7_101_05	TGATAGGC
51	AND74	iTru5_18_C	TCGAAGGT	iTru7_101_06	CGGTTGTT
52	MIZA7	iTru5_18_B	ACCGCATA	iTru7_101_07	CAACGAGT
53	AND77	iTru5_18_A	AGAAGCGT	iTru7_101_08	ACCATAGG
54	MIZA5.16	iTru5_17_H	CCGGAATT	iTru7_101_09	GGTGTACA
55	AND75	iTru5_17_G	TTGATCCG	iTru7_101_10	CAGCATAC
56	MIZA5.13	iTru5_17_F	TAACCGGT	iTru7_101_11	GGACATCA
57	AND91	iTru5_17_E	GTATGCTG	iTru7_101_12	AGAAGGAC
58	PDD6.1	iTru5_17_D	ACCTGACT	iTru7_102_01	CGCCTTAT
59	HAZO5.3	iTru5_17_C	CGTTGCAA	iTru7_102_02	CAGGTAAG
60	PDD6.5	iTru5_17_B	CCTACTGA	iTru7_102_03	TTGCAACG
61	HAZO5.11	iTru5_17_A	GATACTGG	iTru7_102_04	GCTGAATC
62	PDD6.4	iTru5_16_H	CTGTTGAC	iTru7_102_05	GAACGTGA
63	HAZO5.1	iTru5_16_G	AGTTACGG	iTru7_102_06	AACGCACA
64	PDD6.2	iTru5_16_F	GAACATCG	iTru7_102_07	CGCAACTA
65	HAZO5.13	iTru5_16_E	TGACGCAT	iTru7_102_08	TGGCTCTT
66	ODY6.4	iTru5_16_D	ACCACGAT	iTru7_102_09	TGAGCTGT
67	KIR6.12	iTru5_16_C	GCTGGATT	iTru7_102_10	GCCTTAAC
68	ODY6.2	iTru5_16_B	CCAATAGG	iTru7_102_11	TGTGGCTT
69	KIR6.15	iTru5_16_A	GAGATGTC	iTru7_102_12	AACCGTGT
70	ODY6.5	iTru5_15_H	GATCCATG	iTru7_103_01	AATCGCTG
71	KIR6.16	iTru5_15_G	ACATAGGC	iTru7_103_02	GGTCACTA
72	ODY6.1	iTru5_15_F	CAGTGAAG	iTru7_103_03	TAGTCTCG
73	KIR6.18	iTru5_15_E	GCCTATCA	iTru7_103_04	ACCATGTC
74	TOL2.1	iTru5_15_D	CGTCTTGT	iTru7_103_05	AGACATGC
75	TAK7.15	iTru5_15_C	GACATGGT	iTru7_103_06	GATGGAGT
76	TOL2.2	iTru5_15_B	ACACGGTT	iTru7_103_07	CAGTCACA
77	TAK7.30	iTru5_15_A	TTAGGTCG	iTru7_103_08	GTTCTTCG
78	TOL2.15	iTru5_14_H	AACCGAAG	iTru7_103_09	AAGACACC
79	TAK7.17	iTru5_14_G	CATGTTCC	iTru7_103_10	AAGAAGGC
80	RANO330	iTru5_14_F	AGTGTTGG	iTru7_103_11	AGGTTCGA
81	TAK7.7	iTru5_14_E	CAGCGATT	iTru7_103_12	CATGTTCC
82	TOL2.16	iTru5_14_D	CGAACTGT	iTru7_104_01	GTGCCATA
83	SANDRY8.1	iTru5_14_C	GCCTTGTT	iTru7_104_02	CCTTGTAG
84	RANO258	iTru5_14_B	TCATCACC	iTru7_104_03	GCTGGATT
85	SANDRY8.2	iTru5_14_A	TGATCGGA	iTru7_104_04	TAACGAGG
86	RANO2.29	iTru5_13_H	TGTGAAGC	iTru7_104_05	ATGGTTGC
87	BEZ1	iTru5_17_D	ACCTGACT	iTru7_101_04	GATCCATG
88	RANO2.17	iTru5_13_F	GTCATCGA	iTru7_104_07	TTAGGTCG
89	SANDRY8.5	iTru5_13_E	TTCAGGAG	iTru7_104_08	GCAAGATC
90	TSIM6.9	iTru5_13_D	TCGTGGAT	iTru7_104_09	AGAGCCTT
91	BOA8.13	iTru5_13_C	ACATTGCG	iTru7_104_10	GCAATGGA
92	TSIM6.2	iTru5_13_B	CGTCAATG	iTru7_104_11	CTGGAGTA
93	BIN6.8	iTru5_13_A	CCTATACC	iTru7_102_01	ATAAGGCG
94	BIN6.9	iTru5_13_C	ACATTGCG	iTru7_102_03	CGTTGCAA
95	GNISA8.10	iTru5_13_D	TCGTGGAT	iTru7_102_04	GATTCAGC
96	DAR4.4	iTru5_13_E	TTCAGGAG	iTru7_102_05	TCACGTTC
97	GNISA8.11	iTru5_13_F	GTCATCGA	iTru7_102_06	TGTGCGTT
98	TSIM6.5	iTru5_13_G	GAAGGTTC	iTru7_102_07	TAGTTGCG
99	VOLO8.7	iTru5_13_H	TGTGAAGC	iTru7_102_08	AAGAGCCA
100	BIN6.4	iTru5_14_A	TGATCGGA	iTru7_102_09	ACAGCTCA
101	VOLO8.21	iTru5_14_B	TCATCACC	iTru7_102_10	GTTAAGGC
102	BIN6.6	iTru5_14_C	GCCTTGTT	iTru7_102_11	AAGCCACA
103	VOLO8.8	iTru5_14_D	CGAACTGT	iTru7_102_12	ACACGGTT
104	DAR4.20	iTru5_14_E	CAGCGATT	iTru7_103_01	CAGCGATT
105	VOLO8.20	iTru5_14_F	AGTGTTGG	iTru7_103_02	TAGTGACC
106	NDR6.1	iTru5_14_G	CATGTTCC	iTru7_103_03	CGAGACTA
107	LAH8.9	iTru5_14_H	AACCGAAG	iTru7_103_04	GACATGGT
108	DAR4.38	iTru5_15_A	TTAGGTCG	iTru7_103_05	GCATGTCT
109	LAH8.32	iTru5_15_B	ACACGGTT	iTru7_103_06	ACTCCATC
110	DAR4.8	iTru5_15_C	GACATGGT	iTru7_103_07	TGTGACTG
111	LAH8.8	iTru5_15_D	CGTCTTGT	iTru7_103_08	CGAAGAAC
112	NDR6.8	iTru5_15_E	GCCTATCA	iTru7_103_09	GGTGTCTT
113	LAH8.31	iTru5_15_F	CAGTGAAG	iTru7_103_10	AAGAAGGC
114	NDR6.3	iTru5_15_G	ACATAGGC	iTru7_103_11	AGGTTCGA
115	KMTEA7.7	iTru5_15_H	GATCCATG	iTru7_103_12	CATGTTCC
116	NDR6.6	iTru5_16_A	GAGATGTC	iTru7_104_01	GTGCCATA
117	KMTEA7.12	iTru5_16_B	CCAATAGG	iTru7_104_02	CCTTGTAG
118	NOFY6.8	iTru5_16_C	GCTGGATT	iTru7_104_03	GCTGGATT
119	KMTEA7.3	iTru5_16_D	ACCACGAT	iTru7_104_04	TAACGAGG
120	NOFY6.2	iTru5_16_E	TGACGCAT	iTru7_104_05	ATGGTTGC
121	KMTEA7.8	iTru5_16_F	GAACATCG	iTru7_104_06	CCTATACC
122	NOFY6.6	iTru5_16_G	AGTTACGG	iTru7_104_07	TTAGGTCG
123	BEMA4	iTru5_16_H	CTGTTGAC	iTru7_104_08	GCAAGATC
124	MERY1	iTru5_17_A	GATACTGG	iTru7_104_09	AGAGCCTT
125	BEMA10	iTru5_17_B	CCTACTGA	iTru7_104_10	GCAATGGA
126	JEJ1 (JEJ01)	iTru5_17_C	CGTTGCAA	iTru7_104_11	CTGGAGTA
127	BEMA25	iTru5_17_D	ACCTGACT	iTru7_104_12	GAACATCG
128	MERY13	iTru5_17_E	GTATGCTG	iTru7_104_11	CTGGAGTA
129	BEMA21	iTru5_15_A	TTAGGTCG	iTru7_101_01	ACGTTACC
130	MERY3	iTru5_15_B	ACACGGTT	iTru7_101_02	CTGTGTTG
131	KIBO3	iTru5_15_C	GACATGGT	iTru7_101_03	TGAGGTGT
132	JAR14	iTru5_15_D	CGTCTTGT	iTru7_101_04	GATCCATG
133	KIBO6	iTru5_15_E	GCCTATCA	iTru7_101_05	GCCTATCA
134	JAR3.6	iTru5_15_F	CAGTGAAG	iTru7_101_06	AACAACCG
135	MIT5	iTru5_15_G	ACATAGGC	iTru7_101_07	ACTCGTTG
136	JAR3.7	iTru5_15_H	GATCCATG	iTru7_101_08	CCTATGGT
137	KIBO28	iTru5_16_A	GAGATGTC	iTru7_101_09	TGTACACC
138	JAR3.28	iTru5_16_B	CCAATAGG	iTru7_101_10	GTATGCTG
139	ANK6	iTru5_16_C	GCTGGATT	iTru7_101_11	TGATGTCC
140	LAME5.01	iTru5_16_D	ACCACGAT	iTru7_101_12	GTCCTTCT
141	ANK46	iTru5_16_E	TGACGCAT	iTru7_102_01	ATAAGGCG
142	LAME8.15	iTru5_16_F	GAACATCG	iTru7_102_02	CTTACCTG
143	ANK19	iTru5_16_G	AGTTACGG	iTru7_102_03	CGTTGCAA
144	LAME8.8	iTru5_16_H	CTGTTGAC	iTru7_102_04	GATTCAGC
145	ANK48	iTru5_17_A	GATACTGG	iTru7_102_05	TCACGTTC
146	LAME8.16	iTru5_17_B	CCTACTGA	iTru7_102_06	TGTGCGTT
147	MAR9	iTru5_17_C	CGTTGCAA	iTru7_102_07	TAGTTGCG
148	FIA5.15	iTru5_17_D	ACCTGACT	iTru7_102_08	AAGAGCCA
149	MAR14	iTru5_17_E	GTATGCTG	iTru7_102_09	ACAGCTCA
150	FIA5.23	iTru5_17_F	TAACCGGT	iTru7_102_10	GTTAAGGC
151	FIA5.27	iTru5_17_G	TTGATCCG	iTru7_102_11	AAGCCACA
152	MAR.6	iTru5_17_H	CCGGAATT	iTru7_102_12	ACACGGTT
153	FIA5.20	iTru5_18_A	AGAAGCGT	iTru7_103_01	CAGCGATT
154	MAR.39	iTru5_18_B	ACCGCATA	iTru7_103_02	TAGTGACC
155	ANAL3	iTru5_18_C	TCGAAGGT	iTru7_103_03	CGAGACTA
156	HIH1	iTru5_18_D	GGTTGATG	iTru7_103_04	GACATGGT
157	MER13	iTru5_18_E	CTGCACTT	iTru7_103_05	GCATGTCT
158	HIH30	iTru5_18_F	GCTGTAAG	iTru7_103_06	ACTCCATC
159	MER02	iTru5_18_G	CAATGTGG	iTru7_103_07	TGTGACTG
160	MATY5.30	iTru5_18_G	CAATGTGG	iTru7_103_09	GGTGTCTT
161	HIH35	iTru5_18_F	GCTGTAAG	iTru7_103_10	AAGAAGGC
162	LABE5.14	iTru5_18_E	CTGCACTT	iTru7_103_11	AGGTTCGA
163	BOR4	iTru5_18_D	GGTTGATG	iTru7_103_12	CATGTTCC
164	MER17	iTru5_18_C	TCGAAGGT	iTru7_104_01	GTGCCATA
165	BOR13	iTru5_18_B	ACCGCATA	iTru7_104_02	CCTTGTAG
166	ANALABE1	iTru5_18_A	AGAAGCGT	iTru7_104_03	GCTGGATT
167	BOR22	iTru5_17_G	TTGATCCG	iTru7_104_05	ATGGTTGC
168	LABE5.5	iTru5_17_F	TAACCGGT	iTru7_104_06	CCTATACC
169	BOR17	iTru5_17_E	GTATGCTG	iTru7_104_07	TTAGGTCG
170	LABE5.15	iTru5_17_D	ACCTGACT	iTru7_104_08	GCAAGATC
171	TRA52	iTru5_17_C	CGTTGCAA	iTru7_104_09	AGAGCCTT
172	TRA167	iTru5_16_H	CTGTTGAC	iTru7_104_12	GAACATCG
173	JAM4.3	iTru5_16_G	AGTTACGG	iTru7_104_11	CTGGAGTA
174	TRA158	iTru5_16_F	GAACATCG	iTru7_104_10	GCAATGGA
175	JAM4.14	iTru5_16_E	TGACGCAT	iTru7_104_09	AGAGCCTT
176	TRA174	iTru5_16_D	ACCACGAT	iTru7_104_08	GCAAGATC
177	JAM4.19	iTru5_16_C	GCTGGATT	iTru7_104_07	TTAGGTCG
178	FAN2.17	iTru5_16_B	CCAATAGG	iTru7_104_06	CCTATACC
179	VALO7.2	iTru5_18_C	TCGAAGGT	iTru7_101_11	TGATGTCC
180	FAN2.18	iTru5_15_H	GATCCATG	iTru7_104_04	TAACGAGG
181	JAM4.15	iTru5_15_G	ACATAGGC	iTru7_104_03	GCTGGATT
182	FAN4.21	iTru5_15_F	CAGTGAAG	iTru7_104_02	CCTTGTAG
183	JAM4.26	iTru5_15_E	GCCTATCA	iTru7_104_01	GTGCCATA
184	FAN6.8	iTru5_15_D	CGTCTTGT	iTru7_103_12	CATGTTCC
185	TAT14	iTru5_15_C	GACATGGT	iTru7_103_11	AGGTTCGA
186	LAMB5	iTru5_15_B	ACACGGTT	iTru7_103_10	AAGAAGGC
187	TAT16	iTru5_15_A	TTAGGTCG	iTru7_103_09	GGTGTCTT
188	LAMB3	iTru5_14_H	AACCGAAG	iTru7_103_08	CGAAGAAC
189	TAT15	iTru5_14_G	CATGTTCC	iTru7_103_07	TGTGACTG
190	LAMB8	iTru5_14_F	AGTGTTGG	iTru7_103_06	ACTCCATC
191	TAT19	iTru5_14_E	CAGCGATT	iTru7_103_05	GCATGTCT
192	RANO341	iTru5_17_E	CAGCGATT	iTru7_101_05	GCCTATCA
193	HIH16	iTru5_17_F	TAACCGGT	iTru7_101_06	AACAACCG
194	RANO344	iTru5_17_G	TTGATCCG	iTru7_101_07	ACTCGTTG
195	JAM4.4	iTru5_17_H	CCGGAATT	iTru7_101_08	CCTATGGT
196	VALO7.1	iTru5_18_A	AGAAGCGT	iTru7_101_09	TGTACACC
197	SIN3	iTru5_18_E	CTGCACTT	iTru7_102_01	ATAAGGCG
198	SIN11	iTru5_18_F	GCTGTAAG	iTru7_102_02	CTTACCTG
199	SIN5	iTru5_18_G	CAATGTGG	iTru7_102_03	CGTTGCAA
200	SIN21	iTru5_18_H	TATTCGCC	iTru7_102_04	GATTCAGC
201	SIN22	iTru5_18_G	CAATGTGG	iTru7_102_05	TCACGTTC
202	TSINJ31	iTru5_18_F	GCTGTAAG	iTru7_102_06	TGTGCGTT
203	TSINJ49	iTru5_18_E	CTGCACTT	iTru7_102_07	TAGTTGCG
204	TSINJ32	iTru5_18_D	GGTTGATG	iTru7_102_08	AAGAGCCA
205	MOR112	iTru5_18_C	TCGAAGGT	iTru7_102_09	ACAGCTCA
206	TSINJ35	iTru5_18_B	ACCGCATA	iTru7_102_10	GTTAAGGC
207	TSINJ38	iTru5_18_A	AGAAGCGT	iTru7_102_11	AAGCCACA
208	TSINJ47	iTru5_17_G	TTGATCCG	iTru7_103_01	CAGCGATT

## Sheet: Sheet2
Enriched samples for NextSeq Sequencing		UCE Sequencing
		iTru i5 Index Name	RC for NextSeq	iTru i7 Index Name
140	JAR3.28	iTru5_16_B	CCAATAGG	iTru7_101_10	GTATGCTG
134	JAR14	iTru5_15_D	CGTCTTGT	iTru7_101_04	GATCCATG
136	JAR3.6	iTru5_15_F	CAGTGAAG	iTru7_101_06	AACAACCG
138	JAR3.7	iTru5_15_H	GATCCATG	iTru7_101_08	CCTATGGT
126	MERY1	iTru5_17_A	GATACTGG	iTru7_104_09	AGAGCCTT
128	JEJ1 (JEJ01)	iTru5_17_C	CGTTGCAA	iTru7_104_11	CTGGAGTA
130	MERY13	iTru5_17_E	GTATGCTG	iTru7_104_11	CTGGAGTA
132	MERY3	iTru5_15_B	ACACGGTT	iTru7_101_02	CTGTGTTG
158	HIH1	iTru5_18_D	GGTTGATG	iTru7_103_04	GACATGGT
160	HIH30	iTru5_18_F	GCTGTAAG	iTru7_103_06	ACTCCATC
163	HIH35	iTru5_18_F	GCTGTAAG	iTru7_103_10	AAGAAGGC
195	HIH16	iTru5_17_F	TAACCGGT	iTru7_101_06	AACAACCG
141	ANK6	iTru5_16_C	GCTGGATT	iTru7_101_11	TGATGTCC
143	ANK46	iTru5_16_E	TGACGCAT	iTru7_102_01	ATAAGGCG
145	ANK19	iTru5_16_G	AGTTACGG	iTru7_102_03	CGTTGCAA
147	ANK48	iTru5_17_A	GATACTGG	iTru7_102_05	TCACGTTC
165	BOR4	iTru5_18_D	GGTTGATG	iTru7_103_12	CATGTTCC
167	BOR13	iTru5_18_B	ACCGCATA	iTru7_104_02	CCTTGTAG
169	BOR22	iTru5_17_G	TTGATCCG	iTru7_104_05	ATGGTTGC
171	BOR17	iTru5_17_E	GTATGCTG	iTru7_104_07	TTAGGTCG
149	MAR9	iTru5_17_C	CGTTGCAA	iTru7_102_07	TAGTTGCG
151	MAR14	iTru5_17_E	GTATGCTG	iTru7_102_09	ACAGCTCA
154	MAR6	iTru5_17_H	CCGGAATT	iTru7_102_12	ACACGGTT
156	MAR39	iTru5_18_B	ACCGCATA	iTru7_103_02	TAGTGACC
175	JAM4.3	iTru5_16_G	AGTTACGG	iTru7_104_11	CTGGAGTA
177	JAM4.14	iTru5_16_E	TGACGCAT	iTru7_104_09	AGAGCCTT
179	JAM4.19	iTru5_16_C	GCTGGATT	iTru7_104_07	TTAGGTCG
183	JAM4.15	iTru5_15_G	ACATAGGC	iTru7_104_03	GCTGGATT
185	JAM4.26	iTru5_15_E	GCCTATCA	iTru7_104_01	GTGCCATA
197	JAM4.4	iTru5_17_H	CCGGAATT	iTru7_101_08	CCTATGGT
125	BEMA4	iTru5_16_H	CTGTTGAC	iTru7_104_08	GCAAGATC
127	BEMA10	iTru5_17_B	CCTACTGA	iTru7_104_10	GCAATGGA
129	BEMA25	iTru5_17_D	ACCTGACT	iTru7_104_12	GAACATCG
131	BEMA21	iTru5_15_A	TTAGGTCG	iTru7_101_01	ACGTTACC
133	KIBO3	iTru5_15_C	GACATGGT	iTru7_101_03	TGAGGTGT
135	KIBO6	iTru5_15_E	GCCTATCA	iTru7_101_05	GCCTATCA
137	MIT5	iTru5_15_G	ACATAGGC	iTru7_101_07	ACTCGTTG
139	KIBO28	iTru5_16_A	GAGATGTC	iTru7_101_09	TGTACACC
58	PDD6.1	iTru5_17_D	ACCTGACT	iTru7_102_01	CGCCTTAT
60	PDD6.5	iTru5_17_B	CCTACTGA	iTru7_102_03	TTGCAACG
62	PDD6.4	iTru5_16_H	CTGTTGAC	iTru7_102_05	GAACGTGA
64	PDD6.2	iTru5_16_F	GAACATCG	iTru7_102_07	CGCAACTA
42	ANJZ18	iTru5_18_D	GGTTGATG	iTru7_104_08	GATCTTGC
44	ANJZ5	iTru5_18_F	GCTGTAAG	iTru7_104_11	TACTCCAG
46	ANJZ6	iTru5_18_H	TATTCGCC	iTru7_101_01	GGTAACGT
50	ANJZ19	iTru5_18_D	GGTTGATG	iTru7_101_05	TGATAGGC
22	ANOSIB6	iTru5_15_H	GATCCATG	iTru7_102_12	AACCGTGT
24	ANOSIB5	iTru5_16_B	CCAATAGG	iTru7_103_02	GGTCACTA
26	SIB7.15	iTru5_16_D	ACCACGAT	iTru7_103_04	ACCATGTC
28	SIB7.11	iTru5_16_F	GAACATCG	iTru7_103_06	GATGGAGT
38	VOLA5	iTru5_17_H	CCGGAATT	iTru7_104_04	CCTCGTTA
40	VOLA6	iTru5_18_B	ACCGCATA	iTru7_104_06	GGTATAGG
30	TAD4.7	iTru5_16_H	CTGTTGAC	iTru7_103_08	GTTCTTCG
32	TAD4.14	iTru5_17_B	CCTACTGA	iTru7_103_10	GCCTTCTT
34	TAD15	iTru5_17_D	ACCTGACT	iTru7_103_12	GGAACATG
36	TAD18	iTru5_17_F	TAACCGGT	iTru7_104_02	CTACAAGG
48	MIZA5	iTru5_18_F	GCTGTAAG	iTru7_101_03	ACACCTCA
52	MIZA7	iTru5_18_B	ACCGCATA	iTru7_101_07	CAACGAGT
54	MIZA5.16	iTru5_17_H	CCGGAATT	iTru7_101_09	GGTGTACA
56	MIZA5.13	iTru5_17_F	TAACCGGT	iTru7_101_11	GGACATCA
9	TANDRA4.16	iTru5_14_B	TCATCACC	iTru7_101_10	CAGCATAC
11	TAND43	iTru5_14_D	CGAACTGT	iTru7_101_12	AGAAGGAC
13	TAND42	iTru5_14_F	AGTGTTGG	iTru7_102_02	CAGGTAAG
66	ODY6.4	iTru5_16_D	ACCACGAT	iTru7_102_09	TGAGCTGT
68	ODY6.2	iTru5_16_B	CCAATAGG	iTru7_102_11	TGTGGCTT
70	ODY6.5	iTru5_15_H	GATCCATG	iTru7_103_01	AATCGCTG
72	ODY6.1	iTru5_15_F	CAGTGAAG	iTru7_103_03	TAGTCTCG
15	TSINJ52	iTru5_14_H	AACCGAAG	iTru7_102_04	GCTGAATC
199	SIN3	iTru5_18_E	CTGCACTT	iTru7_102_01	ATAAGGCG
200	SIN11	iTru5_18_F	GCTGTAAG	iTru7_102_02	CTTACCTG
201	SIN5	iTru5_18_G	CAATGTGG	iTru7_102_03	CGTTGCAA
202	SIN21	iTru5_18_H	TATTCGCC	iTru7_102_04	GATTCAGC
203	SIN22	iTru5_18_G	CAATGTGG	iTru7_102_05	TCACGTTC
204	TSINJ31	iTru5_18_F	GCTGTAAG	iTru7_102_06	TGTGCGTT
205	TSINJ49	iTru5_18_E	CTGCACTT	iTru7_102_07	TAGTTGCG
206	TSINJ32	iTru5_18_D	GGTTGATG	iTru7_102_08	AAGAGCCA
208	TSINJ35	iTru5_18_B	ACCGCATA	iTru7_102_10	GTTAAGGC
209	TSINJ38	iTru5_18_A	AGAAGCGT	iTru7_102_11	AAGCCACA
210	TSINJ47	iTru5_17_G	TTGATCCG	iTru7_103_01	CAGCGATT
17	TSINJ53	iTru5_15_B	ACACGGTT	iTru7_102_06	AACGCACA
20	TSINJ51	iTru5_15_F	CAGTGAAG	iTru7_102_10	GCCTTAAC
2	ZAH26	iTru5_13_B	CGTCAATG	iTru7_101_02	CAACACAG
4	ZAH129	iTru5_13_D	TCGTGGAT	iTru7_101_04	CATGGATC
6	ZAH53	iTru5_13_F	GTCATCGA	iTru7_101_06	CGGTTGTT
7	ZAH90	iTru5_13_H	TGTGAAGC	iTru7_101_08	ACCATAGG
173	TRA52	iTru5_17_C	CGTTGCAA	iTru7_104_09	AGAGCCTT
174	TRA167	iTru5_16_H	CTGTTGAC	iTru7_104_12	GAACATCG
176	TRA158	iTru5_16_F	GAACATCG	iTru7_104_10	GCAATGGA
178	TRA174	iTru5_16_D	ACCACGAT	iTru7_104_08	GCAAGATC
180	FAN2.17	iTru5_16_B	CCAATAGG	iTru7_104_06	CCTATACC
182	FAN2.18	iTru5_15_H	GATCCATG	iTru7_104_04	TAACGAGG
184	FAN4.21	iTru5_15_F	CAGTGAAG	iTru7_104_02	CCTTGTAG
186	FAN6.8	iTru5_15_D	CGTCTTGT	iTru7_103_12	CATGTTCC
188	LAMB5	iTru5_15_B	ACACGGTT	iTru7_103_10	AAGAAGGC
190	LAMB3	iTru5_14_H	AACCGAAG	iTru7_103_08	CGAAGAAC
192	LAMB8	iTru5_14_F	AGTGTTGG	iTru7_103_06	ACTCCATC
80	RANO330	iTru5_14_F	AGTGTTGG	iTru7_103_11	AGGTTCGA
84	RANO258	iTru5_14_B	TCATCACC	iTru7_104_03	GCTGGATT
86	RANO2.29	iTru5_13_H	TGTGAAGC	iTru7_104_05	ATGGTTGC
88	RANO2.17	iTru5_13_F	GTCATCGA	iTru7_104_07	TTAGGTCG
74	TOL2.1	iTru5_15_D	CGTCTTGT	iTru7_103_05	AGACATGC
76	TOL2.2	iTru5_15_B	ACACGGTT	iTru7_103_07	CAGTCACA
78	TOL2.15	iTru5_14_H	AACCGAAG	iTru7_103_09	AAGACACC
82	TOL2.16	iTru5_14_D	CGAACTGT	iTru7_104_01	GTGCCATA
181	VALO7.2	iTru5_18_C	TCGAAGGT	iTru7_101_11	TGATGTCC
198	VALO7.1	iTru5_18_A	AGAAGCGT	iTru7_101_09	TGTACACC
1	RANO166	iTru5_17_A	GATACTGG	iTru7_101_01	GGTAACGT
39	RANO310	iTru5_17_C	CGTTGCAA	iTru7_101_03	ACACCTCA
194	RANO341	iTru5_17_E	CAGCGATT	iTru7_101_05	GCCTATCA
196	RANO344	iTru5_17_G	TTGATCCG	iTru7_101_07	ACTCGTTG
162	MATY5.30	iTru5_18_G	CAATGTGG	iTru7_103_09	GGTGTCTT
164	LABE5.14	iTru5_18_E	CTGCACTT	iTru7_103_11	AGGTTCGA
168	ANALABE1	iTru5_18_A	AGAAGCGT	iTru7_104_03	GCTGGATT
170	LABE5.5	iTru5_17_F	TAACCGGT	iTru7_104_06	CCTATACC
172	LABE5.15	iTru5_17_D	ACCTGACT	iTru7_104_08	GCAAGATC
142	LAME5.01	iTru5_16_D	ACCACGAT	iTru7_101_12	GTCCTTCT
144	LAME8.15	iTru5_16_F	GAACATCG	iTru7_102_02	CTTACCTG
146	LAME8.8	iTru5_16_H	CTGTTGAC	iTru7_102_04	GATTCAGC
148	LAME8.16	iTru5_17_B	CCTACTGA	iTru7_102_06	TGTGCGTT
157	ANAL3	iTru5_18_C	TCGAAGGT	iTru7_103_03	CGAGACTA
159	MER13	iTru5_18_E	CTGCACTT	iTru7_103_05	GCATGTCT
161	MER02	iTru5_18_G	CAATGTGG	iTru7_103_07	TGTGACTG
166	MER17	iTru5_18_C	TCGAAGGT	iTru7_104_01	GTGCCATA
150	FIA5.15	iTru5_17_D	ACCTGACT	iTru7_102_08	AAGAGCCA
152	FIA5.23	iTru5_17_F	TAACCGGT	iTru7_102_10	GTTAAGGC
153	FIA5.27	iTru5_17_G	TTGATCCG	iTru7_102_11	AAGCCACA
155	FIA5.20	iTru5_18_A	AGAAGCGT	iTru7_103_01	CAGCGATT
108	NDR6.1	iTru5_14_G	CATGTTCC	iTru7_103_03	CGAGACTA
114	NDR6.8	iTru5_15_E	GCCTATCA	iTru7_103_09	GGTGTCTT
116	NDR6.3	iTru5_15_G	ACATAGGC	iTru7_103_11	AGGTTCGA
118	NDR6.6	iTru5_16_A	GAGATGTC	iTru7_104_01	GTGCCATA
90	TSIM6.9	iTru5_13_D	TCGTGGAT	iTru7_104_09	AGAGCCTT
92	TSIM6.2	iTru5_13_B	CGTCAATG	iTru7_104_11	CTGGAGTA
100	TSIM6.5	iTru5_13_G	GAAGGTTC	iTru7_102_07	TAGTTGCG
94	BIN6.8	iTru5_13_A	CCTATACC	iTru7_102_01	ATAAGGCG
96	BIN6.9	iTru5_13_C	ACATTGCG	iTru7_102_03	CGTTGCAA
102	BIN6.4	iTru5_14_A	TGATCGGA	iTru7_102_09	ACAGCTCA
104	BIN6.6	iTru5_14_C	GCCTTGTT	iTru7_102_11	AAGCCACA
187	TAT14	iTru5_15_C	GACATGGT	iTru7_103_11	AGGTTCGA
189	TAT16	iTru5_15_A	TTAGGTCG	iTru7_103_09	GGTGTCTT
191	TAT15	iTru5_14_G	CATGTTCC	iTru7_103_07	TGTGACTG
193	TAT19	iTru5_14_E	CAGCGATT	iTru7_103_05	GCATGTCT
106	DAR4.20	iTru5_14_E	CAGCGATT	iTru7_103_01	CAGCGATT
112	DAR4.8	iTru5_15_C	GACATGGT	iTru7_103_07	TGTGACTG
98	DAR4.4	iTru5_13_E	TTCAGGAG	iTru7_102_05	TCACGTTC
110	DAR4.38	iTru5_15_A	TTAGGTCG	iTru7_103_05	GCATGTCT
23	NOFY6.5	iTru5_17_B	CCTACTGA	iTru7_101_02	CAACACAG
120	NOFY6.8	iTru5_16_C	GCTGGATT	iTru7_104_03	GCTGGATT
122	NOFY6.2	iTru5_16_E	TGACGCAT	iTru7_104_05	ATGGTTGC
124	NOFY6.6	iTru5_16_G	AGTTACGG	iTru7_104_07	TTAGGTCG
33	LAVA19	iTru5_17_C	CGTTGCAA	iTru7_103_11	TCGAACCT
35	LAVA2	iTru5_17_E	GTATGCTG	iTru7_104_01	TATGGCAC
37	LAVA4	iTru5_17_G	TTGATCCG	iTru7_104_03	AATCCAGC
51	AND74	iTru5_18_C	TCGAAGGT	iTru7_101_06	CGGTTGTT
53	AND77	iTru5_18_A	AGAAGCGT	iTru7_101_08	ACCATAGG
55	AND75	iTru5_17_G	TTGATCCG	iTru7_101_10	CAGCATAC
57	AND91	iTru5_17_E	GTATGCTG	iTru7_101_12	AGAAGGAC
59	HAZO5.3	iTru5_17_C	CGTTGCAA	iTru7_102_02	CAGGTAAG
61	HAZO5.11	iTru5_17_A	GATACTGG	iTru7_102_04	GCTGAATC
63	HAZO5.1	iTru5_16_G	AGTTACGG	iTru7_102_06	AACGCACA
65	HAZO5.13	iTru5_16_E	TGACGCAT	iTru7_102_08	TGGCTCTT
91	BOA8.13	iTru5_13_C	ACATTGCG	iTru7_104_10	GCAATGGA
97	GNISA8.10	iTru5_13_D	TCGTGGAT	iTru7_102_04	GATTCAGC
99	GNISA8.11	iTru5_13_F	GTCATCGA	iTru7_102_06	TGTGCGTT
3	MOR143	iTru5_13_C	ACATTGCG	iTru7_101_03	ACACCTCA
5	MOR68	iTru5_13_E	TTCAGGAG	iTru7_101_05	TGATAGGC
207	MOR112	iTru5_18_C	TCGAAGGT	iTru7_102_09	ACAGCTCA
87	BEZ1	iTru5_17_D	ACCTGACT	iTru7_101_04	GATCCATG
12	BEZ7.5	iTru5_14_E	CAGCGATT	iTru7_102_01	CGCCTTAT
14	BEZ16	iTru5_14_G	CATGTTCC	iTru7_102_03	TTGCAACG
16	BEZ17	iTru5_15_A	TTAGGTCG	iTru7_102_05	GAACGTGA
8	BEZ2	iTru5_14_A	TGATCGGA	iTru7_101_09	GGTGTACA
10	BEZ3	iTru5_14_C	GCCTTGTT	iTru7_101_11	GGACATCA
75	TAK7.15	iTru5_15_C	GACATGGT	iTru7_103_06	GATGGAGT
77	TAK7.30	iTru5_15_A	TTAGGTCG	iTru7_103_08	GTTCTTCG
79	TAK7.17	iTru5_14_G	CATGTTCC	iTru7_103_10	AAGAAGGC
81	TAK7.7	iTru5_14_E	CAGCGATT	iTru7_103_12	CATGTTCC
25	ISA2.5	iTru5_16_C	GCTGGATT	iTru7_103_03	TAGTCTCG
27	ISA2.6	iTru5_16_E	TGACGCAT	iTru7_103_05	AGACATGC
29	ISA2.16	iTru5_16_G	AGTTACGG	iTru7_103_07	CAGTCACA
31	ISA2.17	iTru5_17_A	GATACTGG	iTru7_103_09	AAGACACC
67	KIR6.12	iTru5_16_C	GCTGGATT	iTru7_102_10	GCCTTAAC
69	KIR6.15	iTru5_16_A	GAGATGTC	iTru7_102_12	AACCGTGT
71	KIR6.16	iTru5_15_G	ACATAGGC	iTru7_103_02	GGTCACTA
73	KIR6.18	iTru5_15_E	GCCTATCA	iTru7_103_04	ACCATGTC
117	KMTEA7.7	iTru5_15_H	GATCCATG	iTru7_103_12	CATGTTCC
119	KMTEA7.12	iTru5_16_B	CCAATAGG	iTru7_104_02	CCTTGTAG
121	KMTEA7.3	iTru5_16_D	ACCACGAT	iTru7_104_04	TAACGAGG
123	KMTEA7.8	iTru5_16_F	GAACATCG	iTru7_104_06	CCTATACC
101	VOLO8.7	iTru5_13_H	TGTGAAGC	iTru7_102_08	AAGAGCCA
103	VOLO8.21	iTru5_14_B	TCATCACC	iTru7_102_10	GTTAAGGC
105	VOLO8.8	iTru5_14_D	CGAACTGT	iTru7_102_12	ACACGGTT
107	VOLO8.20	iTru5_14_F	AGTGTTGG	iTru7_103_02	TAGTGACC
109	LAH8.9	iTru5_14_H	AACCGAAG	iTru7_103_04	GACATGGT
111	LAH8.32	iTru5_15_B	ACACGGTT	iTru7_103_06	ACTCCATC
113	LAH8.8	iTru5_15_D	CGTCTTGT	iTru7_103_08	CGAAGAAC
115	LAH8.31	iTru5_15_F	CAGTGAAG	iTru7_103_10	AAGAAGGC
83	SANDRY8.1	iTru5_14_C	GCCTTGTT	iTru7_104_02	CCTTGTAG
85	SANDRY8.2	iTru5_14_A	TGATCGGA	iTru7_104_04	TAACGAGG
89	SANDRY8.5	iTru5_13_E	TTCAGGAG	iTru7_104_08	GCAAGATC
18	PET3	iTru5_15_C	GACATGGT	iTru7_102_07	CGCAACTA
19	PET6	iTru5_15_E	GCCTATCA	iTru7_102_09	TGAGCTGT
21	PET4	iTru5_15_G	ACATAGGC	iTru7_102_11	TGTGGCTT
49	BAS16	iTru5_18_E	CTGCACTT	iTru7_101_04	CATGGATC
41	ZOMB7	iTru5_18_C	TCGAAGGT	iTru7_104_07	CGACCTAA
43	ZOMB42	iTru5_18_E	CTGCACTT	iTru7_104_10	TCCATTGC
45	ZOMB5	iTru5_18_G	CAATGTGG	iTru7_104_12	CGATGTTC
47	ZOMB26	iTru5_18_G	CAATGTGG	iTru7_101_02	CAACACAG
93	BOA8.3	iTru5_13_A	CCTATACC	iTru7_104_12	GAACATCG
95	BOA8.4	iTru5_13_B	CGTCAATG	iTru7_102_02	CTTACCTG
