# Supplementary material for: Nuclear and Mitochondrial Phylogenomics of the Sifakas Reveal Cryptic Variation in the Diademed Sifaka
Source: Genes (Basel). 2022 Jun 7;13(6):1026. doi: 10.3390/genes13061026 (PMC9223071; doi:10.3390/genes13061026)
Supplement: Supplementary file 1 [file genes-13-01026-s001.zip › Supplementary Table S3 Model Parameters.xlsx]

## Sheet: Supplementary Table 5 Model Par
Supplementary Table S3: Average Complete Mitogenome coverage across all novel mitogenomes generated here. The average, minimum, and maximum coverage, as well as the number of reads mapped are shown. Only individuals with an average coverage of 5× or greater were included.
Species	fc	rm	tune.args	auc.train	cbi.train	auc.diff.avg	auc.diff.sd	auc.val.avg	auc.val.sd	cbi.val.avg	cbi.val.sd	or.10p.avg	or.10p.sd	or.mtp.avg	or.mtp.sd	AICc	delta.AICc	w.AIC	ncoef
Propithecus diadema clade 5	LQ	5	fc.LQ_rm.5	0.873564	0.724	0.0871249	0.0866262	0.850105	0.098269	0.495	0.39523	0.25	0.5	0.25	0.5	398.512	11.867	0.00248164	3
Propithecus diadema clade 4	LQH	4	fc.LQH_rm.4	0.988829	0.963	0.00806254	0.00535272	0.97319	0.023847	0.68325	0.33905	0.168561	0.178888	0.0435606	0.0503944	811.153	43.5487	3.49547e-10	6
Propithecus edwardsi	H	4	fc.H_rm.4	0.9803	0.727	0.0097296	0.00670548	0.981547	0.00957888	0.422	0.530411	0.0833333	0.096225	0.0416667	0.0833333	690.752	280.002	1.33723e-61	18
