# Supplementary material for: Nuclear and Mitochondrial Phylogenomics of the Sifakas Reveal Cryptic Variation in the Diademed Sifaka
Source: Genes (Basel). 2022 Jun 7;13(6):1026. doi: 10.3390/genes13061026 (PMC9223071; doi:10.3390/genes13061026)
Supplement: Supplementary file 1 [file genes-13-01026-s001.zip › Supplementary Table S4_UCEcounts.xlsx]

## Sheet: Sheet1
Supplementary Table S4: Partitions recovered from the SWSC-entropy models for the 50 most in-formative loci.
R1 Filename	Number of PE Reads
ANAL3_S157_R1_001.fastq.gz	1743549
ANALABE1_S168_R1_001.fastq.gz	3330436
AND74_S51_R1_001.fastq.gz	550067
AND75_S55_R1_001.fastq.gz	154314
AND77_S53_R1_001.fastq.gz	354624
AND91_S57_R1_001.fastq.gz	722924
ANJZ18_S42_R1_001.fastq.gz	1537254
ANJZ19_S50_R1_001.fastq.gz	1027247
ANJZ5_S44_R1_001.fastq.gz	1123351
ANJZ6_S46_R1_001.fastq.gz	219221
ANK19_S145_R1_001.fastq.gz	7941961
ANK46_S143_R1_001.fastq.gz	7541422
ANK48_S147_R1_001.fastq.gz	9463989
ANK6_S141_R1_001.fastq.gz	4738623
ANOSIB5_S24_R1_001.fastq.gz	2248071
ANOSIB6_S22_R1_001.fastq.gz	2428160
BAS16_S49_R1_001.fastq.gz	827880
BEMA10_S127_R1_001.fastq.gz	2034805
BEMA21_S131_R1_001.fastq.gz	2476422
BEMA25_S129_R1_001.fastq.gz	3882395
BEMA4_S125_R1_001.fastq.gz	19371498
BEZ16_S14_R1_001.fastq.gz	377724
BEZ17_S16_R1_001.fastq.gz	1243015
BEZ1_S87_R1_001.fastq.gz	831086
BEZ2_S8_R1_001.fastq.gz	1313209
BEZ3_S10_R1_001.fastq.gz	914967
BEZ7-5_S12_R1_001.fastq.gz	3982888
BIN6-4_S102_R1_001.fastq.gz	1541953
BIN6-6_S104_R1_001.fastq.gz	1262483
BIN6-8_S94_R1_001.fastq.gz	358548
BIN6-9_S96_R1_001.fastq.gz	3481507
BOA8-13_S91_R1_001.fastq.gz	2700688
BOA8-3_S93_R1_001.fastq.gz	310987
BOA8-4_S95_R1_001.fastq.gz	786095
BOR13_S167_R1_001.fastq.gz	4802273
BOR17_S171_R1_001.fastq.gz	4748895
BOR22_S169_R1_001.fastq.gz	3685096
BOR4_S165_R1_001.fastq.gz	2503340
DAR4-20_S106_R1_001.fastq.gz	1234139
DAR4-38_S110_R1_001.fastq.gz	1229558
DAR4-4_S98_R1_001.fastq.gz	1307590
DAR4-8_S112_R1_001.fastq.gz	932328
FAN2-17_S180_R1_001.fastq.gz	621700
FAN2-18_S182_R1_001.fastq.gz	1034033
FAN4-21_S184_R1_001.fastq.gz	278831
FAN6-8_S186_R1_001.fastq.gz	899135
FIA5-15_S150_R1_001.fastq.gz	2869639
FIA5-20_S155_R1_001.fastq.gz	2594936
FIA5-23_S152_R1_001.fastq.gz	1362981
FIA5-27_S153_R1_001.fastq.gz	125
GNISA8-10_S97_R1_001.fastq.gz	793728
GNISA8-11_S99_R1_001.fastq.gz	1952433
HAZO5-11_S61_R1_001.fastq.gz	210289
HAZO5-13_S65_R1_001.fastq.gz	236709
HAZO5-1_S63_R1_001.fastq.gz	867146
HAZO5-3_S59_R1_001.fastq.gz	832228
HIH16_S195_R1_001.fastq.gz	1882993
HIH1_S158_R1_001.fastq.gz	2569567
HIH30_S160_R1_001.fastq.gz	7766730
HIH35_S163_R1_001.fastq.gz	3293252
ISA2-16_S29_R1_001.fastq.gz	383177
ISA2-17_S31_R1_001.fastq.gz	449128
ISA2-5_S25_R1_001.fastq.gz	4543825
ISA2-6_S27_R1_001.fastq.gz	321839
JAM4-14_S177_R1_001.fastq.gz	1026426
JAM4-15_S183_R1_001.fastq.gz	1056246
JAM4-19_S179_R1_001.fastq.gz	980507
JAM4-26_S185_R1_001.fastq.gz	1363337
JAM4-3_S175_R1_001.fastq.gz	583268
JAM4-4_S197_R1_001.fastq.gz	208270
JAR14_S134_R1_001.fastq.gz	6886183
JAR3-28_S140_R1_001.fastq.gz	5317212
JAR3-6_S136_R1_001.fastq.gz	2715884
JAR3-7_S138_R1_001.fastq.gz	2492194
JEJ1_JEJ01_S128_R1_001.fastq.gz	2648989
KIBO28_S139_R1_001.fastq.gz	6023793
KIBO3_S133_R1_001.fastq.gz	2368472
KIBO6_S135_R1_001.fastq.gz	6907841
KIR6-12_S67_R1_001.fastq.gz	683263
KIR6-15_S69_R1_001.fastq.gz	1013625
KIR6-16_S71_R1_001.fastq.gz	527609
KIR6-18_S73_R1_001.fastq.gz	838193
KMTEA7-12_S119_R1_001.fastq.gz	2594583
KMTEA7-3_S121_R1_001.fastq.gz	5483990
KMTEA7-7_S117_R1_001.fastq.gz	802331
KMTEA7-8_S123_R1_001.fastq.gz	22993027
LABE5-14_S164_R1_001.fastq.gz	1975915
LABE5-15_S172_R1_001.fastq.gz	1692395
LABE5-5_S170_R1_001.fastq.gz	2848032
LAH8-31_S115_R1_001.fastq.gz	649198
LAH8-32_S111_R1_001.fastq.gz	906540
LAH8-8_S113_R1_001.fastq.gz	1324152
LAH8-9_S109_R1_001.fastq.gz	602768
LAMB3_S190_R1_001.fastq.gz	1346102
LAMB5_S188_R1_001.fastq.gz	713898
LAMB8_S192_R1_001.fastq.gz	823333
LAME5-01_S142_R1_001.fastq.gz	4210368
LAME8-15_S144_R1_001.fastq.gz	5538182
LAME8-16_S148_R1_001.fastq.gz	3584580
LAME8-8_S146_R1_001.fastq.gz	10747951
LAVA19_S33_R1_001.fastq.gz	954966
LAVA2_S35_R1_001.fastq.gz	1163309
LAVA4_S37_R1_001.fastq.gz	851684
MAR-39_S156_R1_001.fastq.gz	4060066
MAR-6_S154_R1_001.fastq.gz	3296498
MAR14_S151_R1_001.fastq.gz	2302385
MAR9_S149_R1_001.fastq.gz	3386868
MATY5-30_S162_R1_001.fastq.gz	1789485
MER02_S161_R1_001.fastq.gz	2140055
MER13_S159_R1_001.fastq.gz	3059657
MER17_S166_R1_001.fastq.gz	2194163
MERY13_S130_R1_001.fastq.gz	2871943
MERY1_S126_R1_001.fastq.gz	23157591
MERY3_S132_R1_001.fastq.gz	2335328
MIT5_S137_R1_001.fastq.gz	2970902
MIZA5-13_S56_R1_001.fastq.gz	147675
MIZA5-16_S54_R1_001.fastq.gz	507960
MIZA5_S48_R1_001.fastq.gz	718678
MIZA7_S52_R1_001.fastq.gz	566947
MOR112_S207_R1_001.fastq.gz	1190270
MOR143_S3_R1_001.fastq.gz	299048
MOR68_S5_R1_001.fastq.gz	973854
NDR6-1_S108_R1_001.fastq.gz	827974
NDR6-3_S116_R1_001.fastq.gz	868369
NDR6-6_S118_R1_001.fastq.gz	951584
NDR6-8_S114_R1_001.fastq.gz	1181521
NOFY6-2_S122_R1_001.fastq.gz	13151139
NOFY6-5_S23_R1_001.fastq.gz	3444814
NOFY6-6_S124_R1_001.fastq.gz	21611688
NOFY6-8_S120_R1_001.fastq.gz	2870387
ODY6-1_S72_R1_001.fastq.gz	1022726
ODY6-2_S68_R1_001.fastq.gz	1165820
ODY6-4_S66_R1_001.fastq.gz	185459
ODY6-5_S70_R1_001.fastq.gz	1497251
PDD6-1_S58_R1_001.fastq.gz	1246781
PDD6-2_S64_R1_001.fastq.gz	479812
PDD6-4_S62_R1_001.fastq.gz	187112
PDD6-5_S60_R1_001.fastq.gz	220132
PET3_S18_R1_001.fastq.gz	1392014
PET4_S21_R1_001.fastq.gz	1418606
PET6_S19_R1_001.fastq.gz	678798
RANO166_S1_R1_001.fastq.gz	1650518
RANO2-17_S88_R1_001.fastq.gz	1107985
RANO2-29_S86_R1_001.fastq.gz	1558023
RANO258_S84_R1_001.fastq.gz	955767
RANO310_S39_R1_001.fastq.gz	705669
RANO330_S80_R1_001.fastq.gz	1155712
RANO341_S194_R1_001.fastq.gz	167
RANO344_S196_R1_001.fastq.gz	1175817
SANDRY8-1_S83_R1_001.fastq.gz	1372669
SANDRY8-2_S85_R1_001.fastq.gz	1174618
SANDRY8-5_S89_R1_001.fastq.gz	2422596
SIB7-11_S28_R1_001.fastq.gz	1883695
SIB7-15_S26_R1_001.fastq.gz	2008953
SIN11_S200_R1_001.fastq.gz	914709
SIN21_S202_R1_001.fastq.gz	411815
SIN22_S203_R1_001.fastq.gz	593451
SIN3_S199_R1_001.fastq.gz	1422956
SIN5_S201_R1_001.fastq.gz	1169377
TAD15_S34_R1_001.fastq.gz	1415283
TAD18_S36_R1_001.fastq.gz	961300
TAD4-14_S32_R1_001.fastq.gz	38650
TAD4-7_S30_R1_001.fastq.gz	256620
TAK7-15_S75_R1_001.fastq.gz	2597929
TAK7-17_S79_R1_001.fastq.gz	510879
TAK7-30_S77_R1_001.fastq.gz	3242880
TAK7-7_S81_R1_001.fastq.gz	1689034
TAND42_S13_R1_001.fastq.gz	425207
TAND43_S11_R1_001.fastq.gz	169814
TANDRA4-16_S9_R1_001.fastq.gz	1411150
TAT14_S187_R1_001.fastq.gz	1389436
TAT15_S191_R1_001.fastq.gz	669723
TAT16_S189_R1_001.fastq.gz	1060292
TAT19_S193_R1_001.fastq.gz	829289
TOL2-15_S78_R1_001.fastq.gz	2034208
TOL2-16_S82_R1_001.fastq.gz	1912306
TOL2-1_S74_R1_001.fastq.gz	546481
TOL2-2_S76_R1_001.fastq.gz	1626788
TRA158_S176_R1_001.fastq.gz	782825
TRA167_S174_R1_001.fastq.gz	2152715
TRA174_S178_R1_001.fastq.gz	1547317
TRA52_S173_R1_001.fastq.gz	1669312
TSIM6-2_S92_R1_001.fastq.gz	333016
TSIM6-5_S100_R1_001.fastq.gz	1723
TSIM6-9_S90_R1_001.fastq.gz	1121831
TSINJ31_S204_R1_001.fastq.gz	678965
TSINJ32_S206_R1_001.fastq.gz	1308405
TSINJ35_S208_R1_001.fastq.gz	1326650
TSINJ38_S209_R1_001.fastq.gz	1319535
TSINJ47_S210_R1_001.fastq.gz	1132768
TSINJ49_S205_R1_001.fastq.gz	1317399
TSINJ51_S20_R1_001.fastq.gz	618934
TSINJ52_S15_R1_001.fastq.gz	2203586
TSINJ53_S17_R1_001.fastq.gz	1242180
Undetermined_S0_R1_001.fastq.gz	34816060
VALO7-1_S198_R1_001.fastq.gz	1034396
VALO7-2_S181_R1_001.fastq.gz	576868
VOLA5_S38_R1_001.fastq.gz	855406
VOLA6_S40_R1_001.fastq.gz	1249439
VOLO8-20_S107_R1_001.fastq.gz	1199766
VOLO8-21_S103_R1_001.fastq.gz	810728
VOLO8-7_S101_R1_001.fastq.gz	1864535
VOLO8-8_S105_R1_001.fastq.gz	1255996
ZAH129_S4_R1_001.fastq.gz	1168948
ZAH26_S2_R1_001.fastq.gz	364424
ZAH53_S6_R1_001.fastq.gz	533113
ZAH90_S7_R1_001.fastq.gz	1003786
ZOMB26_S47_R1_001.fastq.gz	2802652
ZOMB42_S43_R1_001.fastq.gz	1083507
ZOMB5_S45_R1_001.fastq.gz	1775935
ZOMB7_S41_R1_001.fastq.gz	959186
Total Reads:	493434654
Total w/o undetermined	458618594
Average Number of reads (excluding 'failed' enrichments)	2.22611e+06
