# Supplementary material for: Nuclear and Mitochondrial Phylogenomics of the Sifakas Reveal Cryptic Variation in the Diademed Sifaka
Source: Genes (Basel). 2022 Jun 7;13(6):1026. doi: 10.3390/genes13061026 (PMC9223071; doi:10.3390/genes13061026)
Supplement: Supplementary file 1 [file genes-13-01026-s001.zip › Supplementary Table S5_BioclimVars.xlsx]

## Sheet: Sheet1
Supplementary Table S5		Bioclimatic environmental variables used in sifaka nice model construction
	Name	Variable
	BIO3	Isothermality
	BIO4	Temperature seasonality
	BIO5	Maximum temperature of the warmest month
	BIO13	Precipitation of the wettest month
	BIO14	Precipitation of the driest month
