# Supplementary material for: Nuclear and Mitochondrial Phylogenomics of the Sifakas Reveal Cryptic Variation in the Diademed Sifaka
Source: Genes (Basel). 2022 Jun 7;13(6):1026. doi: 10.3390/genes13061026 (PMC9223071; doi:10.3390/genes13061026)
Supplement: Supplementary file 1 [file genes-13-01026-s001.zip › Supplementary Table S6_WMG Coverage.xlsx]

## Sheet: Sheet1
Supplementary Table S6: Read counts of PE reads from UCE enrichments.
WMG Coverage
DIADEMA	Coverage	Minimum	Max	SD	# mapped reads		177 OVER 5X
ANJZ5	14.4	0	41	5.9	2620
ANJZ6	8.9	0	31	4	1621
ANJZ18	23	0	55	7.1	4195
ANJZ19	11	0	26	4.1	1989
ANOSIB5	5.3	0	15	2.7	968
ANOSIB6	17.4	0	49	7.1	3192
MIZA5.13	13.9	0	32	5	2568
MIZA5.16	16.6	0	40	6.3	3011
MIZA5	15.7	0	34	5.4	2822
MIZA7	29.7	0	69	9.4	5379
ODY6.1	20.9	0	48	6.3	3885
ODY6.2	16.5	0	51	6.1	2987
ODY6.4	7.7	0	22	3.2	1398
ODY6.5	28.7	0	73	9.1	5234
PDD6.1	98.8	0	199	22.3	17913
PDD6.2	17.8	0	51	6.3	3227
PDD6.4	7.8	0	17	3	1416
PDD6.5	5.6	0	19	2.8	1009
SIB7.11	26.3	0	50	7.8	4762
SIB7.15	6.2	0	22	3.1	1134
SIN3	25.5	0	83	9.2	4618
SIN5	16.1	0	43	6.2	2924
SIN11	11.6	0	43	5.4	2111
SIN21	10.4	0	28	4.5	1877
SIN22	8.1	0	20	3.4	1470
TAD4.14	8.5	0	30	4.1	1531
TAD15	23.9	0	57	8.4	4351
TAD18	24.6	0	61	8.5	4465
TANDRA4.16	24.8	0	78	8.1	4505
TSINJ31	17.1	0	52	6.5	3094
TSINJ32	23.3	0	74	8.3	4255
TSINJ35	26.2	0	85	10.6	4727
TSINJ38	22.7	0	78	8.8	4109
TSINJ47	18.3	0	60	6.5	3314
TSINJ49	22.8	0	60	7.9	4125
TSINJ51	8.4	0	34	4.3	1525
TSINJ52	9	0	22	3.5	1644
TSINJ53	15.1	0	83	8.6	2715
VOLA6	12.9	0	34	5.2	2341
ZAH26	19.3	0	43	6.5	3492
ZAH53	8.2	0	25	3.7	1484
ZAH90	14.4	0	47	5.6	2630
ZAH129	48.1	0	133	14.8	8727
Western:
AND74	14	0	35	4.8	2570
AND75	8.5	0	20	3.4	1554
AND91	14.3	0	35	4.8	2590
ANK6	17.8	1	37	5.4	3196
ANK19	17.5	0	37	5.3	3175
ANK46	8.9	0	22	3.5	1610
ANK48	9.3	0	30	3.8	1683
BAS16	7.8	0	18	3.2	1405
BEMA4	48	2	80	10.8	8835
BEMA10	40.6	0	101	10	7439
BEMA21	25.7	1	45	7.1	4739
BEMA25	57.5	0	102	12.9	10559
BEZ2	6.2	0	15	2.7	1145
BEZ17	7.6	0	21	3.4	1388
BIN6.6	10.9	0	29	4	1962
BIN6.8	5.3	0	17	2.5	958
BIN6.9	130.4	1	321	30.5	23628
BOA8.13	11.8	0	24	3.9	2139
BOR4	10.3	0	30	3.7	1862
BOR13	37.2	3	76	9.4	6674
BOR22	16.5	1	37	4.8	2980
DAR4.4	83.9	11	194	19.9	15175
DAR4.8	16.9	4	32	4.4	3039
DAR4.20	20.8	2	55	6.4	3756
DAR4.38	12.5	1	29	4.1	2277
GNISA8.10	128.4	4	212	29.7	23452
HAZO5.1	20.7	0	43	5.9	3770
HAZO5.3	13.3	1	30	4.4	2439
HAZO5.11	5.1	0	14	2.4	933
HAZO5.13	12.4	0	26	4.2	2262
HIH1	17.2	0	38	4.9	3097
HIH16	18.8	0	50	5.8	3386
HIH30	56.9	9	104	12.8	10320
HIH35	13.3	0	35	4.6	2399
ISA2.17	5	0	16	2.7	918
JAM4.3	8.6	0	25	3.9	1568
JAM4.14	13	0	29	4.4	2371
JAM4.15	13.1	1	32	4.8	2389
JAM4.26	19.5	0	42	5.5	3570
KIBO3	25.8	0	68	7.7	4702
KIBO6	95.8	0	174	21.4	17538
KIBO28	48.5	0	80	11.6	8937
KIR6.12	7.8	0	19	3.4	1406
KIR6.15	9	0	22	3.4	1640
KIR6.16	15.7	0	33	4.9	2885
KIR6.18	24.8	0	53	8.3	5193
KMTEA7.3	31.3	0	53	7.3	5772
KMTEA7.7	10.9	0	24	4.1	2024
KMTEA7.8	40.1	1	65	8.6	7374
KMTEA7.12	13.5	0	32	4.5	2471
LAH8.8	15	0	31	4.4	2708
LAH8.9	9	0	22	3.9	1642
LAH8.31	10.8	0	26	3.7	1978
LAH8.32	13.9	0	32	4.4	2509
LAVA2	20.2	0	41	6	3710
LAVA4	14.4	0	34	4.6	2642
LAVA19	8.7	0	22	3.3	1597
MAR9	7	0	17	2.9	1262
MAR14	15.6	0	49	5.7	2802
MAR.6	13.2	1	35	5	2369
MAR.39	45.9	1	87	10	8274
MIT5	30.9	0	55	8	5651
MOR68	8.2	0	21	3.4	1514
MOR143	6	0	20	3	1084
NDR6.3	10.7	0	23	3.5	1961
NDR6.6	11	2	23	3.6	2009
NDR6.8	20.2	4	40	5.3	3617
NOFY6.2	51.6	3	87	9.8	9402
NOFY6.5	22	1	64	7.3	3958
NOFY6.6	43.6	2	70	8.5	7951
NOFY6.8	13.6	1	30	4.2	2484
PET3	11.7	1	29	4.5	2151
PET4	12.3	0	28	4.8	2262
PET6	6.8	0	20	3.2	1259
SANDRY8.1	6.3	0	20	2.7	1148
SANDRY8.2	6.5	0	19	2.8	1186
TAK7.7	23.1	0	49	6.5	4275
TAK7.17	10.7	0	25	4.2	1973
TAT15	6.2	0	26	2.7	1115
TAT19	8.2	1	19	3	1487
TSIM6.9	7.4	0	23	3.7	899
VOLO8.8	17.7	0	37	5.2	3239
VOLO8.20	13.1	0	33	4.7	2397
VOLO8.21	9.7	0	22	3.8	1787
ZOMB5	30.7	0	61	7.8	5597
ZOMB7	10.7	0	26	4.3	1975
ZOMB26	37.7	0	81	9.8	6844
ZOMB42	15.8	0	33	4.9	2869
EASTERN:
ANALABE1	7.4	0	19	3.2	1353
FAN2.17	15.8	0	42	6.2	2881
FAN2.18	27.3	0	58	7.3	4958
FAN4.21	5.9	0	17	2.8	1065
FAN6.8	12.6	0	32	4.7	2278
FIA5.15	8.2	0	22	3.4	1479
FIA5.20	23	0	54	6.4	4187
FIA5.23	11.6	0	37	4.5	2089
JAR3.6	23.1	0	51	7.6	4187
JAR3.7	33.9	0	100	9.8	6173
JAR3.28	35.7	0	79	10.9	6454
JAR14	77.1	0	163	18.9	13941
JEJ01	38.1	0	71	9.6	6926
LABE5.5	10.7	0	25	3.8	1951
LABE5.14	6.3	0	19	3.3	1131
LABE5.15	10.2	0	33	4.3	1871
LAMB3	21.1	0	52	6.8	3817
LAMB5	10.6	0	25	3.6	1911
LAMB8	9.6	0	24	3.8	1753
LAME5.01	19	0	51	6.4	3466
LAME8.8	30.6	0	55	8.2	5653
LAME8.15	8.8	0	24	3.2	1624
LAME8.16	8.5	0	26	3.6	1530
MATY5.30	15.9	0	32	4.8	2884
MER02	28.8	0	54	7.5	5227
MER13	36.7	0	80	9.6	6687
MER17	7.1	0	20	3	1293
MERY3	31.9	0	69	9.3	5754
MERY13	44.4	0	104	11.5	8083
MIZA5.13	14	0	32	5	2574
MIZA5.16	16.7	0	40	6.2	3023
MIZA5	15.7	0	34	5.3	2825
MIZA7	29.9	0	69	9.2	5380
RANO2.29	19.6	0	55	6.8	3575
RANO166	131.1	0	289	32.3	23768
RANO310	11.3	0	33	4.4	2042
RANO330	10.8	0	27	4	1971
RANO344	10.1	0	23	3.8	1827
TOL2.2	29.1	0	51	7.9	3585
TOL2.15	33.4	0	65	9	4112
TOL2.16	28.8	0	68	8.3	5288
TRA52	8.8	0	30	3.5	1602
TRA158	14.4	0	39	5.3	2607
TRA167	11.4	0	33	4.4	2066
TRA174	22.4	0	54	7.7	4063
VALO7.1	12.4	0	27	4.7	2246

## Sheet: Sheet2
5		5-131x
5.1
5.3
5.3
5.6
5.9
6
6.2
6.2
6.2
6.3
6.3
6.5
6.8
7
7.1
7.4
7.4
7.6
7.7
7.8
7.8
7.8
8.1
8.2
8.2
8.2
8.2
8.4
8.5
8.5
8.5
8.6
8.7
8.8
8.8
8.9
8.9
9
9
9
9.3
9.6
9.7
10.1
10.2
10.3
10.4
10.6
10.7
10.7
10.7
10.7
10.8
10.8
10.9
10.9
11
11
11.3
11.4
11.6
11.6
11.7
11.8
12.3
12.4
12.4
12.5
12.6
12.9
13
13.1
13.1
13.2
13.3
13.3
13.5
13.6
13.9
13.9
14
14
14.3
14.4
14.4
14.4
14.4
15
15.1
15.6
15.7
15.7
15.7
15.8
15.8
15.9
16.1
16.5
16.5
16.6
16.7
16.9
17.1
17.2
17.4
17.5
17.7
17.8
17.8
18.3
18.8
19
19.3
19.5
19.6
20.2
20.2
20.7
20.8
20.9
21.1
22
22.4
22.7
22.8
23
23
23.1
23.1
23.3
23.9
24.6
24.8
24.8
25.5
25.7
25.8
26.2
26.3
27.3
28.7
28.8
28.8
29.1
29.7
29.9
30.6
30.7
30.9
31.3
31.9
33.4
33.9
35.7
36.7
37.2
37.7
38.1
40.1
40.6
43.6
44.4
45.9
48
48.1
48.5
51.6
56.9
57.5
77.1
83.9
95.8
98.8
128.4
130.4
131.1
Coverage
