# Supplementary material for: Nuclear and Mitochondrial Phylogenomics of the Sifakas Reveal Cryptic Variation in the Diademed Sifaka
Source: Genes (Basel). 2022 Jun 7;13(6):1026. doi: 10.3390/genes13061026 (PMC9223071; doi:10.3390/genes13061026)
Supplement: Supplementary file 1 [file genes-13-01026-s001.zip › Supplementary Table S7(foremelyTS6)_WMG_pairwiseDistances.csv]

Supplementary Table S7: CMG Distances Number of recovered reads per individual following UCE enrichment. Note: samples with less than 40,000 PE reads (highlighted in red) were excluded from analysis with the phyluce pipeline.
	AB286049	KJ944257 1	ZAH90 -WMG	ZAH53 WMG	ZAH26 WMG	TANDRA4.16 WMG	ZAH129 WMG	ANJZ6 WMG	ANJZ5 WMG	TSINJ53 WMG	TSINJ47 WMG	SIN21 WMG	SIN3 WMG	ANJZ19 WMG	TSINJ52 WMG	SIN11 WMG	TSINJ51 WMG	TSINJ38 WMG	SIN22 WMG	TSINJ49 WMG	TSINJ35 WMG	TSINJ32 WMG	TSINJ31 WMG	SIN5 WMG	ANJZ18 WMG	VOLA6 WMG	TAD18 WMG	PDD6.4 WMG	MIZA5.16 WMG	ODY6.5 WMG	ODY6.4 WMG	ODY6.1 WMG	SIB7.15 WMG	SIB7.11 WMG	ODY6.2 WMG	MIZA5.13 WMG	PDD6.1 WMG	MIZA5 WMG	MIZA7 WMG	ANOSIB6 WMG	TAD15 WMG	TAD4.14 WMG	PDD6.2 WMG	JAR3.7	JAR3.28	JAR14	KJ944257 2	MIZA5.13	MIZA5.16
AB286049		92.44	92.48	92.47	92.48	92.47	92.41	92.43	92.44	92.51	92.51	92.51	92.51	92.49	92.47	92.47	92.48	92.47	92.47	92.47	92.48	92.47	92.47	92.47	92.48	92.42	92.44	92.43	92.43	92.43	92.42	92.43	92.42	92.43	92.43	92.44	92.43	92.43	92.42	92.43	92.36	92.36	92.37	92.44	92.44	92.44	92.42	92.44	92.43
KJ944257 1	92.44		99.95	99.95	99.95	99.95	99.48	99.5	99.5	99.54	99.54	99.54	99.54	99.52	99.5	99.5	99.5	99.5	99.5	99.5	99.49	99.5	99.5	99.5	99.52	99.21	97.79	97.77	97.77	97.79	97.78	97.79	97.77	97.78	97.79	97.79	97.75	97.74	97.79	97.74	97.76	97.76	97.77	99.56	99.56	99.56	97.78	97.79	97.77
ZAH90 -WMG	92.48	99.95		99.99	100	100	99.53	99.55	99.55	99.58	99.58	99.58	99.58	99.56	99.55	99.55	99.55	99.55	99.55	99.55	99.54	99.55	99.55	99.55	99.57	99.26	97.83	97.81	97.81	97.83	97.82	97.83	97.81	97.82	97.83	97.83	97.79	97.78	97.83	97.78	97.8	97.8	97.81	99.61	99.61	99.61	97.81	97.83	97.81
ZAH53 WMG	92.47	99.95	99.99		99.99	99.99	99.52	99.54	99.54	99.58	99.58	99.58	99.58	99.56	99.54	99.54	99.54	99.54	99.54	99.54	99.53	99.54	99.54	99.54	99.56	99.25	97.82	97.81	97.81	97.82	97.81	97.82	97.81	97.81	97.82	97.82	97.79	97.77	97.82	97.77	97.79	97.79	97.8	99.6	99.6	99.6	97.8	97.82	97.81
ZAH26 WMG	92.48	99.95	100	99.99		100	99.53	99.55	99.55	99.58	99.58	99.58	99.58	99.56	99.55	99.55	99.55	99.55	99.55	99.55	99.54	99.55	99.55	99.55	99.57	99.26	97.83	97.81	97.81	97.83	97.82	97.83	97.81	97.82	97.83	97.83	97.79	97.78	97.83	97.78	97.8	97.8	97.81	99.61	99.61	99.61	97.81	97.83	97.81
TANDRA4.16 WMG	92.47	99.95	100	99.99	100		99.52	99.54	99.55	99.58	99.58	99.58	99.58	99.56	99.54	99.54	99.54	99.54	99.54	99.54	99.54	99.54	99.54	99.54	99.57	99.25	97.82	97.81	97.81	97.82	97.82	97.82	97.81	97.82	97.82	97.83	97.79	97.77	97.83	97.77	97.8	97.8	97.8	99.6	99.6	99.6	97.81	97.83	97.81
ZAH129 WMG	92.41	99.48	99.53	99.52	99.53	99.52		99.81	99.81	99.59	99.59	99.59	99.59	99.6	99.59	99.59	99.58	99.59	99.59	99.59	99.58	99.59	99.59	99.59	99.6	99.19	97.8	97.79	97.79	97.8	97.79	97.8	97.79	97.79	97.8	97.81	97.77	97.75	97.81	97.75	97.75	97.75	97.76	99.64	99.64	99.64	97.79	97.81	97.79
ANJZ6 WMG	92.43	99.5	99.55	99.54	99.55	99.54	99.81		99.99	99.61	99.61	99.61	99.61	99.61	99.61	99.61	99.6	99.61	99.61	99.61	99.6	99.61	99.61	99.61	99.62	99.22	97.83	97.81	97.81	97.83	97.82	97.83	97.81	97.82	97.83	97.83	97.79	97.78	97.83	97.78	97.75	97.75	97.76	99.66	99.66	99.66	97.81	97.83	97.81
ANJZ5 WMG	92.44	99.5	99.55	99.54	99.55	99.55	99.81	99.99		99.61	99.61	99.61	99.61	99.62	99.61	99.61	99.61	99.61	99.61	99.61	99.6	99.61	99.61	99.61	99.62	99.22	97.83	97.82	97.82	97.83	97.82	97.83	97.82	97.82	97.83	97.83	97.8	97.78	97.83	97.78	97.75	97.75	97.76	99.66	99.66	99.66	97.81	97.83	97.82
TSINJ53 WMG	92.51	99.54	99.58	99.58	99.58	99.58	99.59	99.61	99.61		100	100	100	99.66	99.62	99.62	99.62	99.62	99.62	99.62	99.61	99.62	99.62	99.62	99.64	99.26	97.9	97.89	97.89	97.9	97.89	97.9	97.89	97.89	97.9	97.91	97.84	97.83	97.87	97.83	97.83	97.82	97.83	99.68	99.68	99.68	97.86	97.91	97.89
TSINJ47 WMG	92.51	99.54	99.58	99.58	99.58	99.58	99.59	99.61	99.61	100		100	100	99.66	99.62	99.62	99.62	99.62	99.62	99.62	99.61	99.62	99.62	99.62	99.64	99.26	97.9	97.89	97.89	97.9	97.89	97.9	97.89	97.89	97.9	97.91	97.84	97.83	97.87	97.83	97.83	97.82	97.83	99.68	99.68	99.68	97.86	97.91	97.89
SIN21 WMG	92.51	99.54	99.58	99.58	99.58	99.58	99.59	99.61	99.61	100	100		100	99.66	99.62	99.62	99.62	99.62	99.62	99.62	99.61	99.62	99.62	99.62	99.64	99.26	97.9	97.89	97.89	97.9	97.89	97.9	97.89	97.89	97.9	97.91	97.84	97.83	97.87	97.83	97.83	97.82	97.83	99.68	99.68	99.68	97.86	97.91	97.89
SIN3 WMG	92.51	99.54	99.58	99.58	99.58	99.58	99.59	99.61	99.61	100	100	100		99.66	99.62	99.62	99.62	99.62	99.62	99.62	99.61	99.62	99.62	99.62	99.64	99.26	97.9	97.89	97.89	97.9	97.89	97.9	97.89	97.89	97.9	97.91	97.84	97.83	97.87	97.83	97.83	97.82	97.83	99.68	99.68	99.68	97.86	97.91	97.89
ANJZ19 WMG	92.49	99.52	99.56	99.56	99.56	99.56	99.6	99.61	99.62	99.66	99.66	99.66	99.66		99.63	99.63	99.62	99.63	99.63	99.63	99.62	99.63	99.63	99.63	99.65	99.25	97.88	97.87	97.87	97.88	97.87	97.88	97.87	97.87	97.88	97.89	97.86	97.84	97.89	97.83	97.83	97.83	97.84	99.69	99.69	99.69	97.87	97.89	97.87
TSINJ52 WMG	92.47	99.5	99.55	99.54	99.55	99.54	99.59	99.61	99.61	99.62	99.62	99.62	99.62	99.63		100	100	100	100	100	99.99	100	100	100	99.89	99.22	97.81	97.8	97.8	97.81	97.8	97.81	97.8	97.81	97.81	97.82	97.79	97.77	97.83	97.77	97.77	97.77	97.78	99.68	99.68	99.68	97.81	97.82	97.8
SIN11 WMG	92.47	99.5	99.55	99.54	99.55	99.54	99.59	99.61	99.61	99.62	99.62	99.62	99.62	99.63	100		100	100	100	100	99.99	100	100	100	99.89	99.22	97.81	97.8	97.8	97.81	97.81	97.81	97.8	97.81	97.81	97.82	97.79	97.78	97.83	97.78	97.78	97.78	97.78	99.68	99.68	99.68	97.81	97.82	97.8
TSINJ51 WMG	92.48	99.5	99.55	99.54	99.55	99.54	99.58	99.6	99.61	99.62	99.62	99.62	99.62	99.62	100	100		100	100	100	99.99	100	100	100	99.89	99.21	97.81	97.8	97.8	97.81	97.8	97.81	97.8	97.8	97.81	97.82	97.79	97.77	97.83	97.78	97.77	97.77	97.78	99.68	99.68	99.68	97.81	97.82	97.8
TSINJ38 WMG	92.47	99.5	99.55	99.54	99.55	99.54	99.59	99.61	99.61	99.62	99.62	99.62	99.62	99.63	100	100	100		100	100	99.99	100	100	100	99.89	99.22	97.81	97.8	97.8	97.81	97.81	97.81	97.8	97.81	97.81	97.82	97.79	97.78	97.83	97.78	97.78	97.78	97.78	99.68	99.68	99.68	97.81	97.82	97.8
SIN22 WMG	92.47	99.5	99.55	99.54	99.55	99.54	99.59	99.61	99.61	99.62	99.62	99.62	99.62	99.63	100	100	100	100		100	99.99	100	100	100	99.89	99.22	97.81	97.8	97.8	97.81	97.81	97.81	97.8	97.81	97.81	97.82	97.79	97.78	97.83	97.78	97.78	97.78	97.78	99.68	99.68	99.68	97.81	97.82	97.8
TSINJ49 WMG	92.47	99.5	99.55	99.54	99.55	99.54	99.59	99.61	99.61	99.62	99.62	99.62	99.62	99.63	100	100	100	100	100		99.99	100	100	100	99.89	99.22	97.81	97.8	97.8	97.81	97.81	97.81	97.8	97.81	97.81	97.82	97.79	97.78	97.83	97.78	97.78	97.78	97.78	99.68	99.68	99.68	97.81	97.82	97.8
TSINJ35 WMG	92.48	99.49	99.54	99.53	99.54	99.54	99.58	99.6	99.6	99.61	99.61	99.61	99.61	99.62	99.99	99.99	99.99	99.99	99.99	99.99		99.99	99.99	99.99	99.88	99.21	97.82	97.81	97.81	97.82	97.81	97.82	97.81	97.81	97.82	97.83	97.8	97.78	97.84	97.78	97.78	97.78	97.79	99.67	99.67	99.67	97.82	97.83	97.81
TSINJ32 WMG	92.47	99.5	99.55	99.54	99.55	99.54	99.59	99.61	99.61	99.62	99.62	99.62	99.62	99.63	100	100	100	100	100	100	99.99		100	100	99.89	99.22	97.81	97.8	97.8	97.81	97.81	97.81	97.8	97.81	97.81	97.82	97.79	97.78	97.83	97.78	97.78	97.78	97.78	99.68	99.68	99.68	97.81	97.82	97.8
TSINJ31 WMG	92.47	99.5	99.55	99.54	99.55	99.54	99.59	99.61	99.61	99.62	99.62	99.62	99.62	99.63	100	100	100	100	100	100	99.99	100		100	99.89	99.22	97.81	97.8	97.8	97.81	97.81	97.81	97.8	97.81	97.81	97.82	97.79	97.78	97.83	97.78	97.78	97.78	97.78	99.68	99.68	99.68	97.81	97.82	97.8
SIN5 WMG	92.47	99.5	99.55	99.54	99.55	99.54	99.59	99.61	99.61	99.62	99.62	99.62	99.62	99.63	100	100	100	100	100	100	99.99	100	100		99.89	99.22	97.81	97.8	97.8	97.81	97.81	97.81	97.8	97.81	97.81	97.82	97.79	97.78	97.83	97.78	97.78	97.78	97.78	99.68	99.68	99.68	97.81	97.82	97.8
ANJZ18 WMG	92.48	99.52	99.57	99.56	99.57	99.57	99.6	99.62	99.62	99.64	99.64	99.64	99.64	99.65	99.89	99.89	99.89	99.89	99.89	99.89	99.88	99.89	99.89	99.89		99.24	97.81	97.8	97.8	97.81	97.81	97.81	97.8	97.81	97.81	97.82	97.79	97.78	97.83	97.78	97.78	97.78	97.78	99.71	99.71	99.71	97.81	97.82	97.8
VOLA6 WMG	92.42	99.21	99.26	99.25	99.26	99.25	99.19	99.22	99.22	99.26	99.26	99.26	99.26	99.25	99.22	99.22	99.21	99.22	99.22	99.22	99.21	99.22	99.22	99.22	99.24		97.83	97.83	97.83	97.83	97.82	97.83	97.83	97.83	97.83	97.83	97.78	97.76	97.82	97.76	97.77	97.77	97.78	99.27	99.27	99.27	97.8	97.83	97.83
TAD18 WMG	92.44	97.79	97.83	97.82	97.83	97.82	97.8	97.83	97.83	97.9	97.9	97.9	97.9	97.88	97.81	97.81	97.81	97.81	97.81	97.81	97.82	97.81	97.81	97.81	97.81	97.83		99.95	99.95	99.95	99.94	99.95	99.93	99.93	99.95	99.99	99.72	99.72	99.74	99.71	99.56	99.56	99.57	97.85	97.85	97.85	99.72	99.99	99.95
PDD6.4 WMG	92.43	97.77	97.81	97.81	97.81	97.81	97.79	97.81	97.82	97.89	97.89	97.89	97.89	97.87	97.8	97.8	97.8	97.8	97.8	97.8	97.81	97.8	97.8	97.8	97.8	97.83	99.95		100	99.95	99.94	99.95	99.93	99.93	99.95	99.96	99.72	99.72	99.74	99.71	99.56	99.56	99.57	97.84	97.84	97.84	99.72	99.96	100
MIZA5.16 WMG	92.43	97.77	97.81	97.81	97.81	97.81	97.79	97.81	97.82	97.89	97.89	97.89	97.89	97.87	97.8	97.8	97.8	97.8	97.8	97.8	97.81	97.8	97.8	97.8	97.8	97.83	99.95	100		99.95	99.94	99.95	99.93	99.93	99.95	99.96	99.72	99.72	99.74	99.71	99.56	99.56	99.57	97.84	97.84	97.84	99.72	99.96	100
ODY6.5 WMG	92.43	97.79	97.83	97.82	97.83	97.82	97.8	97.83	97.83	97.9	97.9	97.9	97.9	97.88	97.81	97.81	97.81	97.81	97.81	97.81	97.82	97.81	97.81	97.81	97.81	97.83	99.95	99.95	99.95		99.99	100	99.93	99.93	100	99.96	99.72	99.72	99.74	99.71	99.56	99.56	99.57	97.85	97.85	97.85	99.72	99.96	99.95
ODY6.4 WMG	92.42	97.78	97.82	97.81	97.82	97.82	97.79	97.82	97.82	97.89	97.89	97.89	97.89	97.87	97.8	97.81	97.8	97.81	97.81	97.81	97.81	97.81	97.81	97.81	97.81	97.82	99.94	99.94	99.94	99.99		99.99	99.93	99.93	99.99	99.95	99.72	99.71	99.73	99.7	99.56	99.56	99.56	97.84	97.84	97.84	99.71	99.95	99.94
ODY6.1 WMG	92.43	97.79	97.83	97.82	97.83	97.82	97.8	97.83	97.83	97.9	97.9	97.9	97.9	97.88	97.81	97.81	97.81	97.81	97.81	97.81	97.82	97.81	97.81	97.81	97.81	97.83	99.95	99.95	99.95	100	99.99		99.93	99.93	100	99.96	99.72	99.72	99.74	99.71	99.56	99.56	99.57	97.85	97.85	97.85	99.72	99.96	99.95
SIB7.15 WMG	92.42	97.77	97.81	97.81	97.81	97.81	97.79	97.81	97.82	97.89	97.89	97.89	97.89	97.87	97.8	97.8	97.8	97.8	97.8	97.8	97.81	97.8	97.8	97.8	97.8	97.83	99.93	99.93	99.93	99.93	99.93	99.93		100	99.93	99.94	99.7	99.7	99.72	99.69	99.54	99.54	99.55	97.84	97.84	97.84	99.7	99.94	99.93
SIB7.11 WMG	92.43	97.78	97.82	97.81	97.82	97.82	97.79	97.82	97.82	97.89	97.89	97.89	97.89	97.87	97.81	97.81	97.8	97.81	97.81	97.81	97.81	97.81	97.81	97.81	97.81	97.83	99.93	99.93	99.93	99.93	99.93	99.93	100		99.93	99.94	99.71	99.7	99.72	99.69	99.55	99.55	99.55	97.84	97.84	97.84	99.7	99.94	99.93
ODY6.2 WMG	92.43	97.79	97.83	97.82	97.83	97.82	97.8	97.83	97.83	97.9	97.9	97.9	97.9	97.88	97.81	97.81	97.81	97.81	97.81	97.81	97.82	97.81	97.81	97.81	97.81	97.83	99.95	99.95	99.95	100	99.99	100	99.93	99.93		99.96	99.72	99.72	99.74	99.71	99.56	99.56	99.57	97.85	97.85	97.85	99.72	99.96	99.95
MIZA5.13 WMG	92.44	97.79	97.83	97.82	97.83	97.83	97.81	97.83	97.83	97.91	97.91	97.91	97.91	97.89	97.82	97.82	97.82	97.82	97.82	97.82	97.83	97.82	97.82	97.82	97.82	97.83	99.99	99.96	99.96	99.96	99.95	99.96	99.94	99.94	99.96		99.73	99.72	99.74	99.71	99.57	99.57	99.58	97.86	97.86	97.86	99.73	100	99.96
PDD6.1 WMG	92.43	97.75	97.79	97.79	97.79	97.79	97.77	97.79	97.8	97.84	97.84	97.84	97.84	97.86	97.79	97.79	97.79	97.79	97.79	97.79	97.8	97.79	97.79	97.79	97.79	97.78	99.72	99.72	99.72	99.72	99.72	99.72	99.7	99.71	99.72	99.73		99.98	99.88	99.82	99.62	99.62	99.63	97.81	97.81	97.81	99.87	99.73	99.72
MIZA5 WMG	92.43	97.74	97.78	97.77	97.78	97.77	97.75	97.78	97.78	97.83	97.83	97.83	97.83	97.84	97.77	97.78	97.77	97.78	97.78	97.78	97.78	97.78	97.78	97.78	97.78	97.76	99.72	99.72	99.72	99.72	99.71	99.72	99.7	99.7	99.72	99.72	99.98		99.87	99.82	99.6	99.6	99.61	97.8	97.8	97.8	99.87	99.72	99.72
MIZA7 WMG	92.42	97.79	97.83	97.82	97.83	97.83	97.81	97.83	97.83	97.87	97.87	97.87	97.87	97.89	97.83	97.83	97.83	97.83	97.83	97.83	97.84	97.83	97.83	97.83	97.83	97.82	99.74	99.74	99.74	99.74	99.73	99.74	99.72	99.72	99.74	99.74	99.88	99.87		99.83	99.61	99.61	99.61	97.84	97.84	97.84	99.94	99.74	99.74
ANOSIB6 WMG	92.43	97.74	97.78	97.77	97.78	97.77	97.75	97.78	97.78	97.83	97.83	97.83	97.83	97.83	97.77	97.78	97.78	97.78	97.78	97.78	97.78	97.78	97.78	97.78	97.78	97.76	99.71	99.71	99.71	99.71	99.7	99.71	99.69	99.69	99.71	99.71	99.82	99.82	99.83		99.59	99.59	99.59	97.8	97.8	97.8	99.83	99.71	99.71
TAD15 WMG	92.36	97.76	97.8	97.79	97.8	97.8	97.75	97.75	97.75	97.83	97.83	97.83	97.83	97.83	97.77	97.78	97.77	97.78	97.78	97.78	97.78	97.78	97.78	97.78	97.78	97.77	99.56	99.56	99.56	99.56	99.56	99.56	99.54	99.55	99.56	99.57	99.62	99.6	99.61	99.59		99.99	99.99	97.79	97.79	97.79	99.6	99.57	99.56
TAD4.14 WMG	92.36	97.76	97.8	97.79	97.8	97.8	97.75	97.75	97.75	97.82	97.82	97.82	97.82	97.83	97.77	97.78	97.77	97.78	97.78	97.78	97.78	97.78	97.78	97.78	97.78	97.77	99.56	99.56	99.56	99.56	99.56	99.56	99.54	99.55	99.56	99.57	99.62	99.6	99.61	99.59	99.99		99.99	97.79	97.79	97.79	99.6	99.57	99.56
PDD6.2 WMG	92.37	97.77	97.81	97.8	97.81	97.8	97.76	97.76	97.76	97.83	97.83	97.83	97.83	97.84	97.78	97.78	97.78	97.78	97.78	97.78	97.79	97.78	97.78	97.78	97.78	97.78	99.57	99.57	99.57	99.57	99.56	99.57	99.55	99.55	99.57	99.58	99.63	99.61	99.61	99.59	99.99	99.99		97.79	97.79	97.79	99.61	99.58	99.57
JAR3.7	92.44	99.56	99.61	99.6	99.61	99.6	99.64	99.66	99.66	99.68	99.68	99.68	99.68	99.69	99.68	99.68	99.68	99.68	99.68	99.68	99.67	99.68	99.68	99.68	99.71	99.27	97.85	97.84	97.84	97.85	97.84	97.85	97.84	97.84	97.85	97.86	97.81	97.8	97.84	97.8	97.79	97.79	97.79		100	100	97.82	97.86	97.84
JAR3.28	92.44	99.56	99.61	99.6	99.61	99.6	99.64	99.66	99.66	99.68	99.68	99.68	99.68	99.69	99.68	99.68	99.68	99.68	99.68	99.68	99.67	99.68	99.68	99.68	99.71	99.27	97.85	97.84	97.84	97.85	97.84	97.85	97.84	97.84	97.85	97.86	97.81	97.8	97.84	97.8	97.79	97.79	97.79	100		100	97.82	97.86	97.84
JAR14	92.44	99.56	99.61	99.6	99.61	99.6	99.64	99.66	99.66	99.68	99.68	99.68	99.68	99.69	99.68	99.68	99.68	99.68	99.68	99.68	99.67	99.68	99.68	99.68	99.71	99.27	97.85	97.84	97.84	97.85	97.84	97.85	97.84	97.84	97.85	97.86	97.81	97.8	97.84	97.8	97.79	97.79	97.79	100	100		97.82	97.86	97.84
KJ944257 2	92.42	97.78	97.81	97.8	97.81	97.81	97.79	97.81	97.81	97.86	97.86	97.86	97.86	97.87	97.81	97.81	97.81	97.81	97.81	97.81	97.82	97.81	97.81	97.81	97.81	97.8	99.72	99.72	99.72	99.72	99.71	99.72	99.7	99.7	99.72	99.73	99.87	99.87	99.94	99.83	99.6	99.6	99.61	97.82	97.82	97.82		99.73	99.72
MIZA5.13	92.44	97.79	97.83	97.82	97.83	97.83	97.81	97.83	97.83	97.91	97.91	97.91	97.91	97.89	97.82	97.82	97.82	97.82	97.82	97.82	97.83	97.82	97.82	97.82	97.82	97.83	99.99	99.96	99.96	99.96	99.95	99.96	99.94	99.94	99.96	100	99.73	99.72	99.74	99.71	99.57	99.57	99.58	97.86	97.86	97.86	99.73		99.96
MIZA5.16	92.43	97.77	97.81	97.81	97.81	97.81	97.79	97.81	97.82	97.89	97.89	97.89	97.89	97.87	97.8	97.8	97.8	97.8	97.8	97.8	97.81	97.8	97.8	97.8	97.8	97.83	99.95	100	100	99.95	99.94	99.95	99.93	99.93	99.95	99.96	99.72	99.72	99.74	99.71	99.56	99.56	99.57	97.84	97.84	97.84	99.72	99.96
MIZA5	92.43	97.74	97.78	97.77	97.78	97.77	97.75	97.78	97.78	97.83	97.83	97.83	97.83	97.84	97.77	97.78	97.77	97.78	97.78	97.78	97.78	97.78	97.78	97.78	97.78	97.76	99.72	99.72	99.72	99.72	99.71	99.72	99.7	99.7	99.72	99.72	99.98	100	99.87	99.82	99.6	99.6	99.61	97.8	97.8	97.8	99.87	99.72	99.72
MIZA7	92.42	97.79	97.83	97.82	97.83	97.83	97.81	97.83	97.83	97.87	97.87	97.87	97.87	97.89	97.83	97.83	97.83	97.83	97.83	97.83	97.84	97.83	97.83	97.83	97.83	97.82	99.74	99.74	99.74	99.74	99.73	99.74	99.72	99.72	99.74	99.74	99.88	99.87	100	99.83	99.61	99.61	99.61	97.84	97.84	97.84	99.94	99.74	99.74
FAN2.17	92.4	97.71	97.75	97.75	97.75	97.75	97.76	97.76	97.77	97.79	97.79	97.79	97.79	97.76	97.74	97.74	97.73	97.74	97.74	97.74	97.75	97.74	97.74	97.74	97.74	97.66	97.78	97.76	97.76	97.76	97.76	97.76	97.75	97.76	97.76	97.78	97.72	97.72	97.72	97.69	97.7	97.7	97.7	97.8	97.8	97.8	97.7	97.78	97.76
LAMB3	92.39	97.71	97.75	97.74	97.75	97.74	97.75	97.76	97.76	97.78	97.78	97.78	97.78	97.75	97.73	97.73	97.72	97.73	97.73	97.73	97.74	97.73	97.73	97.73	97.73	97.65	97.77	97.76	97.76	97.76	97.75	97.76	97.75	97.75	97.76	97.78	97.71	97.71	97.71	97.68	97.69	97.69	97.7	97.79	97.79	97.79	97.69	97.78	97.76
LAMB8	92.39	97.71	97.75	97.75	97.75	97.74	97.75	97.76	97.76	97.78	97.78	97.78	97.78	97.75	97.73	97.73	97.73	97.73	97.73	97.73	97.74	97.73	97.73	97.73	97.73	97.65	97.77	97.76	97.76	97.76	97.75	97.76	97.75	97.75	97.76	97.78	97.72	97.72	97.72	97.69	97.69	97.69	97.7	97.8	97.8	97.8	97.69	97.78	97.76
TOL2.16	92.4	97.71	97.75	97.74	97.75	97.74	97.75	97.76	97.76	97.78	97.78	97.78	97.78	97.75	97.73	97.73	97.72	97.73	97.73	97.73	97.74	97.73	97.73	97.73	97.73	97.65	97.77	97.76	97.76	97.76	97.75	97.76	97.75	97.75	97.76	97.78	97.71	97.71	97.71	97.68	97.69	97.69	97.7	97.79	97.79	97.79	97.69	97.78	97.76
LAMB5	92.4	97.72	97.76	97.76	97.76	97.76	97.76	97.78	97.78	97.8	97.8	97.8	97.8	97.79	97.76	97.76	97.76	97.76	97.76	97.76	97.77	97.76	97.76	97.76	97.76	97.68	97.8	97.79	97.79	97.79	97.78	97.79	97.78	97.78	97.79	97.81	97.76	97.76	97.76	97.73	97.7	97.7	97.7	97.84	97.84	97.84	97.74	97.81	97.79
TRA167	92.4	97.72	97.76	97.76	97.76	97.76	97.75	97.77	97.78	97.8	97.8	97.8	97.8	97.79	97.76	97.76	97.75	97.76	97.76	97.76	97.77	97.76	97.76	97.76	97.76	97.68	97.8	97.79	97.79	97.79	97.78	97.79	97.77	97.78	97.79	97.8	97.75	97.75	97.75	97.72	97.69	97.69	97.7	97.83	97.83	97.83	97.73	97.8	97.79
TRA174	92.4	97.72	97.76	97.76	97.76	97.76	97.75	97.77	97.78	97.8	97.8	97.8	97.8	97.79	97.76	97.76	97.75	97.76	97.76	97.76	97.77	97.76	97.76	97.76	97.76	97.68	97.8	97.79	97.79	97.79	97.78	97.79	97.77	97.78	97.79	97.8	97.75	97.75	97.75	97.72	97.69	97.69	97.7	97.83	97.83	97.83	97.73	97.8	97.79
RANO166	92.36	97.72	97.76	97.76	97.76	97.75	97.75	97.77	97.77	97.82	97.82	97.82	97.82	97.8	97.77	97.77	97.76	97.77	97.77	97.77	97.78	97.77	97.77	97.77	97.77	97.68	97.79	97.78	97.78	97.78	97.78	97.78	97.77	97.78	97.78	97.8	97.74	97.74	97.74	97.71	97.69	97.69	97.7	97.83	97.83	97.83	97.72	97.8	97.78
VALO7.1	92.36	97.72	97.76	97.76	97.76	97.75	97.75	97.77	97.77	97.82	97.82	97.82	97.82	97.8	97.77	97.77	97.76	97.77	97.77	97.77	97.78	97.77	97.77	97.77	97.77	97.68	97.79	97.78	97.78	97.78	97.78	97.78	97.77	97.78	97.78	97.8	97.74	97.74	97.74	97.71	97.69	97.69	97.7	97.83	97.83	97.83	97.72	97.8	97.78
TRA158	92.36	97.67	97.71	97.71	97.71	97.71	97.7	97.72	97.72	97.77	97.77	97.77	97.77	97.75	97.72	97.72	97.71	97.72	97.72	97.72	97.73	97.72	97.72	97.72	97.72	97.64	97.75	97.73	97.73	97.73	97.73	97.73	97.72	97.73	97.73	97.75	97.69	97.69	97.7	97.66	97.64	97.64	97.65	97.78	97.78	97.78	97.68	97.75	97.73
RANO330	92.42	97.69	97.73	97.73	97.73	97.73	97.73	97.75	97.75	97.81	97.81	97.81	97.81	97.78	97.74	97.75	97.74	97.75	97.75	97.75	97.75	97.75	97.75	97.75	97.75	97.68	97.78	97.77	97.77	97.77	97.76	97.77	97.76	97.76	97.77	97.79	97.73	97.73	97.73	97.7	97.68	97.68	97.68	97.81	97.81	97.81	97.71	97.79	97.77
TOL2.2	92.4	97.69	97.73	97.73	97.73	97.72	97.72	97.74	97.74	97.8	97.8	97.8	97.8	97.77	97.74	97.74	97.73	97.74	97.74	97.74	97.75	97.74	97.74	97.74	97.74	97.67	97.78	97.76	97.76	97.76	97.76	97.76	97.75	97.76	97.76	97.78	97.72	97.72	97.72	97.69	97.67	97.67	97.68	97.8	97.8	97.8	97.7	97.78	97.76
TRA52	92.4	97.68	97.72	97.72	97.72	97.71	97.71	97.73	97.73	97.79	97.79	97.79	97.79	97.76	97.73	97.73	97.72	97.73	97.73	97.73	97.74	97.73	97.73	97.73	97.73	97.67	97.77	97.75	97.75	97.75	97.75	97.75	97.74	97.75	97.75	97.77	97.71	97.71	97.71	97.68	97.66	97.66	97.67	97.79	97.79	97.79	97.69	97.77	97.75
FAN2.18	92.43	97.86	97.9	97.9	97.9	97.9	97.89	97.91	97.91	97.91	97.91	97.91	97.91	97.94	97.89	97.89	97.88	97.89	97.89	97.89	97.9	97.89	97.89	97.89	97.9	97.77	97.81	97.8	97.8	97.8	97.79	97.8	97.79	97.79	97.8	97.82	97.79	97.79	97.79	97.75	97.72	97.72	97.73	97.96	97.96	97.96	97.77	97.82	97.8
FAN4.21	92.4	97.87	97.92	97.91	97.92	97.91	97.9	97.93	97.93	97.92	97.92	97.92	97.92	97.94	97.89	97.89	97.88	97.89	97.89	97.89	97.9	97.89	97.89	97.89	97.9	97.78	97.8	97.79	97.79	97.8	97.79	97.8	97.78	97.78	97.8	97.81	97.79	97.79	97.79	97.75	97.72	97.72	97.73	97.95	97.95	97.95	97.77	97.81	97.79
RANO2.29	92.43	97.85	97.9	97.89	97.9	97.9	97.89	97.91	97.91	97.91	97.91	97.91	97.91	97.94	97.89	97.89	97.88	97.89	97.89	97.89	97.89	97.89	97.89	97.89	97.9	97.77	97.81	97.79	97.79	97.79	97.79	97.79	97.78	97.79	97.79	97.81	97.79	97.79	97.79	97.75	97.73	97.73	97.73	97.95	97.95	97.95	97.79	97.81	97.79
RANO310	92.45	97.87	97.92	97.91	97.92	97.91	97.91	97.93	97.93	97.93	97.93	97.93	97.93	97.95	97.9	97.91	97.9	97.91	97.91	97.91	97.91	97.91	97.91	97.91	97.92	97.79	97.83	97.81	97.81	97.81	97.81	97.81	97.8	97.81	97.81	97.83	97.81	97.81	97.81	97.77	97.75	97.74	97.75	97.97	97.97	97.97	97.8	97.83	97.81
RANO344	92.44	97.87	97.91	97.9	97.91	97.91	97.91	97.92	97.93	97.92	97.92	97.92	97.92	97.95	97.9	97.9	97.89	97.9	97.9	97.9	97.91	97.9	97.9	97.9	97.91	97.78	97.82	97.81	97.81	97.81	97.8	97.81	97.8	97.8	97.81	97.83	97.81	97.81	97.81	97.76	97.74	97.74	97.75	97.96	97.96	97.96	97.8	97.83	97.81
TOL2.15	92.44	97.87	97.91	97.9	97.91	97.91	97.91	97.92	97.93	97.92	97.92	97.92	97.92	97.95	97.9	97.9	97.89	97.9	97.9	97.9	97.91	97.9	97.9	97.9	97.91	97.78	97.82	97.81	97.81	97.81	97.8	97.81	97.8	97.8	97.81	97.83	97.81	97.81	97.81	97.76	97.74	97.74	97.75	97.96	97.96	97.96	97.8	97.83	97.81
FAN6.8	92.42	97.84	97.89	97.88	97.89	97.89	97.88	97.9	97.91	97.9	97.9	97.9	97.9	97.93	97.88	97.88	97.87	97.88	97.88	97.88	97.88	97.88	97.88	97.88	97.89	97.76	97.8	97.79	97.79	97.79	97.78	97.79	97.77	97.78	97.79	97.8	97.79	97.79	97.79	97.74	97.72	97.72	97.72	97.94	97.94	97.94	97.76	97.8	97.79
ANALABE1	92.54	97.58	97.63	97.63	97.63	97.62	97.58	97.59	97.59	97.64	97.64	97.64	97.64	97.68	97.64	97.65	97.64	97.65	97.65	97.65	97.65	97.65	97.65	97.65	97.66	97.56	97.55	97.53	97.53	97.53	97.53	97.53	97.52	97.53	97.53	97.55	97.53	97.51	97.55	97.56	97.48	97.48	97.49	97.68	97.68	97.68	97.53	97.55	97.53
FIA5.15	92.56	97.61	97.66	97.66	97.66	97.65	97.61	97.62	97.62	97.67	97.67	97.67	97.67	97.7	97.67	97.67	97.66	97.67	97.67	97.67	97.67	97.67	97.67	97.67	97.68	97.59	97.58	97.57	97.57	97.57	97.56	97.57	97.56	97.56	97.57	97.59	97.56	97.54	97.59	97.59	97.51	97.51	97.52	97.7	97.7	97.7	97.57	97.59	97.57
FIA5.20	92.56	97.61	97.66	97.66	97.66	97.66	97.61	97.62	97.63	97.67	97.67	97.67	97.67	97.71	97.67	97.67	97.66	97.67	97.67	97.67	97.68	97.67	97.67	97.67	97.68	97.59	97.58	97.57	97.57	97.57	97.56	97.57	97.56	97.56	97.57	97.59	97.56	97.54	97.59	97.59	97.51	97.51	97.52	97.71	97.71	97.71	97.56	97.59	97.57
FIA5.23	92.56	97.61	97.65	97.66	97.65	97.65	97.6	97.62	97.62	97.67	97.67	97.67	97.67	97.7	97.66	97.67	97.66	97.67	97.67	97.67	97.67	97.67	97.67	97.67	97.68	97.59	97.57	97.56	97.56	97.56	97.55	97.56	97.55	97.55	97.56	97.58	97.55	97.54	97.58	97.59	97.51	97.5	97.51	97.7	97.7	97.7	97.56	97.58	97.56
LABE5.5	92.56	97.61	97.65	97.66	97.65	97.65	97.6	97.62	97.62	97.67	97.67	97.67	97.67	97.7	97.66	97.67	97.66	97.67	97.67	97.67	97.67	97.67	97.67	97.67	97.68	97.59	97.57	97.56	97.56	97.56	97.55	97.56	97.55	97.55	97.56	97.58	97.55	97.54	97.58	97.59	97.51	97.5	97.51	97.7	97.7	97.7	97.56	97.58	97.56
MER02	92.56	97.61	97.65	97.66	97.65	97.65	97.6	97.62	97.62	97.67	97.67	97.67	97.67	97.7	97.66	97.67	97.66	97.67	97.67	97.67	97.67	97.67	97.67	97.67	97.68	97.59	97.57	97.56	97.56	97.56	97.55	97.56	97.55	97.55	97.56	97.58	97.55	97.54	97.58	97.59	97.51	97.5	97.51	97.7	97.7	97.7	97.56	97.58	97.56
MER17	92.55	97.61	97.66	97.66	97.66	97.66	97.6	97.62	97.62	97.66	97.66	97.66	97.66	97.7	97.66	97.66	97.66	97.66	97.66	97.66	97.67	97.66	97.66	97.66	97.68	97.58	97.57	97.56	97.56	97.56	97.55	97.56	97.55	97.55	97.56	97.58	97.55	97.54	97.58	97.58	97.5	97.5	97.51	97.7	97.7	97.7	97.56	97.58	97.56
LAME5.01	92.56	97.61	97.66	97.66	97.66	97.66	97.61	97.62	97.63	97.67	97.67	97.67	97.67	97.71	97.67	97.67	97.66	97.67	97.67	97.67	97.68	97.67	97.67	97.67	97.68	97.59	97.58	97.57	97.57	97.57	97.56	97.57	97.56	97.56	97.57	97.59	97.56	97.54	97.59	97.59	97.51	97.51	97.52	97.71	97.71	97.71	97.56	97.59	97.57
LAME8.8	92.56	97.61	97.66	97.66	97.66	97.66	97.61	97.62	97.63	97.67	97.67	97.67	97.67	97.71	97.67	97.67	97.66	97.67	97.67	97.67	97.68	97.67	97.67	97.67	97.68	97.59	97.58	97.57	97.57	97.57	97.56	97.57	97.56	97.56	97.57	97.59	97.56	97.54	97.59	97.59	97.51	97.51	97.52	97.71	97.71	97.71	97.56	97.59	97.57
MATY5.30	92.56	97.61	97.65	97.66	97.65	97.65	97.6	97.62	97.62	97.67	97.67	97.67	97.67	97.7	97.66	97.67	97.66	97.67	97.67	97.67	97.67	97.67	97.67	97.67	97.68	97.59	97.57	97.56	97.56	97.56	97.55	97.56	97.55	97.55	97.56	97.58	97.55	97.54	97.58	97.59	97.51	97.5	97.51	97.7	97.7	97.7	97.56	97.58	97.56
MER13	92.56	97.61	97.65	97.66	97.65	97.65	97.6	97.62	97.62	97.67	97.67	97.67	97.67	97.7	97.66	97.67	97.66	97.67	97.67	97.67	97.67	97.67	97.67	97.67	97.68	97.59	97.57	97.56	97.56	97.56	97.55	97.56	97.55	97.55	97.56	97.58	97.55	97.54	97.58	97.59	97.51	97.5	97.51	97.7	97.7	97.7	97.56	97.58	97.56
LABE5.15	92.56	97.61	97.66	97.66	97.66	97.65	97.61	97.62	97.62	97.67	97.67	97.67	97.67	97.71	97.67	97.67	97.66	97.67	97.67	97.67	97.67	97.67	97.67	97.67	97.68	97.59	97.58	97.56	97.56	97.56	97.56	97.56	97.55	97.56	97.56	97.58	97.56	97.54	97.58	97.59	97.51	97.51	97.52	97.71	97.71	97.71	97.56	97.58	97.56
LABE5.14	92.54	97.6	97.64	97.64	97.64	97.64	97.59	97.6	97.61	97.65	97.65	97.65	97.65	97.69	97.65	97.65	97.65	97.65	97.65	97.65	97.66	97.65	97.65	97.65	97.67	97.58	97.56	97.54	97.54	97.54	97.54	97.54	97.53	97.54	97.54	97.56	97.54	97.52	97.56	97.57	97.49	97.49	97.49	97.69	97.69	97.69	97.54	97.56	97.54
LAME8.16	92.54	97.59	97.64	97.64	97.64	97.64	97.59	97.6	97.61	97.65	97.65	97.65	97.65	97.69	97.65	97.65	97.64	97.65	97.65	97.65	97.66	97.65	97.65	97.65	97.67	97.57	97.56	97.55	97.55	97.55	97.54	97.55	97.54	97.54	97.55	97.57	97.54	97.52	97.57	97.57	97.49	97.49	97.5	97.69	97.69	97.69	97.55	97.57	97.55
LAME8.15	92.55	97.61	97.65	97.65	97.65	97.65	97.6	97.62	97.62	97.66	97.66	97.66	97.66	97.7	97.66	97.66	97.66	97.66	97.66	97.66	97.67	97.66	97.66	97.66	97.68	97.58	97.57	97.56	97.56	97.56	97.55	97.56	97.55	97.55	97.56	97.58	97.55	97.54	97.58	97.58	97.5	97.5	97.51	97.7	97.7	97.7	97.56	97.58	97.56
JAR3.6	92.42	97.5	97.55	97.55	97.55	97.55	97.5	97.54	97.54	97.56	97.56	97.56	97.56	97.57	97.54	97.54	97.53	97.54	97.54	97.54	97.54	97.54	97.54	97.54	97.55	97.43	97.35	97.33	97.33	97.33	97.33	97.33	97.32	97.33	97.33	97.35	97.38	97.37	97.41	97.36	97.35	97.36	97.36	97.59	97.59	97.59	97.38	97.35	97.33
JEJ01	92.42	97.5	97.55	97.55	97.55	97.55	97.5	97.54	97.54	97.56	97.56	97.56	97.56	97.57	97.54	97.54	97.53	97.54	97.54	97.54	97.54	97.54	97.54	97.54	97.55	97.43	97.35	97.33	97.33	97.33	97.33	97.33	97.32	97.33	97.33	97.35	97.38	97.37	97.41	97.36	97.35	97.36	97.36	97.59	97.59	97.59	97.38	97.35	97.33
MERY3	92.42	97.5	97.55	97.55	97.55	97.55	97.5	97.54	97.54	97.56	97.56	97.56	97.56	97.57	97.54	97.54	97.53	97.54	97.54	97.54	97.54	97.54	97.54	97.54	97.55	97.43	97.35	97.33	97.33	97.33	97.33	97.33	97.32	97.33	97.33	97.35	97.38	97.37	97.41	97.36	97.35	97.36	97.36	97.59	97.59	97.59	97.38	97.35	97.33
MERY13	92.42	97.5	97.55	97.55	97.55	97.55	97.5	97.54	97.54	97.56	97.56	97.56	97.56	97.57	97.54	97.54	97.53	97.54	97.54	97.54	97.54	97.54	97.54	97.54	97.55	97.43	97.35	97.33	97.33	97.33	97.33	97.33	97.32	97.33	97.33	97.35	97.38	97.37	97.41	97.36	97.35	97.36	97.36	97.59	97.59	97.59	97.38	97.35	97.33
AND74	94.9	92.18	92.22	92.22	92.22	92.22	92.22	92.22	92.22	92.25	92.25	92.25	92.25	92.24	92.19	92.19	92.2	92.19	92.19	92.19	92.19	92.19	92.19	92.19	92.21	92.27	92.27	92.25	92.25	92.25	92.25	92.25	92.25	92.25	92.25	92.28	92.27	92.27	92.27	92.3	92.22	92.22	92.23	92.22	92.22	92.22	92.26	92.28	92.25
HAZO5.11	94.91	92.19	92.23	92.23	92.23	92.23	92.22	92.22	92.23	92.25	92.25	92.25	92.25	92.25	92.19	92.2	92.2	92.2	92.2	92.2	92.2	92.2	92.2	92.2	92.21	92.28	92.27	92.25	92.25	92.25	92.24	92.25	92.24	92.25	92.25	92.28	92.27	92.27	92.27	92.3	92.22	92.22	92.23	92.22	92.22	92.22	92.26	92.28	92.25
TAK7.7	94.89	92.18	92.22	92.22	92.22	92.22	92.22	92.22	92.22	92.25	92.25	92.25	92.25	92.24	92.19	92.19	92.2	92.19	92.19	92.19	92.19	92.19	92.19	92.19	92.21	92.27	92.27	92.25	92.25	92.25	92.25	92.25	92.24	92.25	92.25	92.28	92.27	92.27	92.27	92.3	92.22	92.22	92.23	92.22	92.22	92.22	92.26	92.28	92.25
AND75	94.9	92.18	92.22	92.22	92.22	92.22	92.22	92.22	92.22	92.25	92.25	92.25	92.25	92.24	92.19	92.19	92.2	92.19	92.19	92.19	92.19	92.19	92.19	92.19	92.21	92.27	92.27	92.25	92.25	92.25	92.25	92.25	92.25	92.25	92.25	92.28	92.27	92.27	92.27	92.3	92.22	92.22	92.23	92.22	92.22	92.22	92.26	92.28	92.25
LAVA4	94.88	92.16	92.2	92.2	92.2	92.2	92.21	92.18	92.18	92.21	92.21	92.21	92.21	92.21	92.15	92.16	92.16	92.16	92.16	92.16	92.16	92.16	92.16	92.16	92.17	92.24	92.22	92.2	92.2	92.2	92.2	92.2	92.2	92.21	92.2	92.23	92.22	92.22	92.22	92.25	92.17	92.17	92.18	92.18	92.18	92.18	92.21	92.23	92.2
BOA8.13	94.88	92.18	92.22	92.22	92.22	92.22	92.22	92.22	92.22	92.25	92.25	92.25	92.25	92.25	92.2	92.21	92.21	92.21	92.21	92.21	92.21	92.21	92.21	92.21	92.22	92.27	92.27	92.25	92.25	92.25	92.25	92.25	92.25	92.25	92.25	92.28	92.27	92.27	92.27	92.3	92.22	92.22	92.23	92.23	92.23	92.23	92.26	92.28	92.25
TAK7.17	94.88	92.18	92.22	92.21	92.22	92.21	92.21	92.21	92.21	92.24	92.24	92.24	92.24	92.25	92.2	92.2	92.2	92.2	92.2	92.2	92.2	92.2	92.2	92.2	92.21	92.27	92.27	92.24	92.24	92.24	92.24	92.24	92.24	92.25	92.24	92.27	92.27	92.27	92.26	92.29	92.22	92.21	92.22	92.22	92.22	92.22	92.25	92.27	92.24
VOLO8.8	94.9	92.19	92.23	92.23	92.23	92.23	92.21	92.21	92.21	92.25	92.25	92.25	92.25	92.25	92.2	92.2	92.2	92.2	92.2	92.2	92.2	92.2	92.2	92.2	92.21	92.27	92.27	92.24	92.24	92.24	92.24	92.24	92.24	92.25	92.24	92.27	92.27	92.27	92.26	92.29	92.22	92.21	92.22	92.22	92.22	92.22	92.25	92.27	92.24
VOLO8.20	94.9	92.19	92.23	92.23	92.23	92.23	92.21	92.21	92.21	92.25	92.25	92.25	92.25	92.25	92.2	92.2	92.2	92.2	92.2	92.2	92.2	92.2	92.2	92.2	92.21	92.27	92.27	92.24	92.24	92.24	92.24	92.24	92.24	92.25	92.24	92.27	92.27	92.27	92.26	92.29	92.22	92.21	92.22	92.22	92.22	92.22	92.25	92.27	92.24
LAH8.8	94.9	92.2	92.24	92.23	92.24	92.23	92.24	92.24	92.25	92.29	92.29	92.29	92.29	92.28	92.23	92.23	92.23	92.23	92.23	92.23	92.23	92.23	92.23	92.23	92.24	92.3	92.3	92.27	92.27	92.27	92.27	92.27	92.27	92.28	92.27	92.3	92.3	92.3	92.29	92.32	92.25	92.25	92.25	92.25	92.25	92.25	92.28	92.3	92.27
LAH8.32	94.9	92.2	92.24	92.23	92.24	92.23	92.24	92.24	92.25	92.29	92.29	92.29	92.29	92.28	92.23	92.23	92.23	92.23	92.23	92.23	92.23	92.23	92.23	92.23	92.24	92.3	92.3	92.27	92.27	92.27	92.27	92.27	92.27	92.28	92.27	92.3	92.3	92.3	92.29	92.32	92.25	92.25	92.25	92.25	92.25	92.25	92.28	92.3	92.27
LAVA2	94.89	92.17	92.21	92.2	92.21	92.2	92.21	92.19	92.19	92.22	92.22	92.22	92.22	92.21	92.16	92.16	92.17	92.16	92.16	92.16	92.16	92.16	92.16	92.16	92.18	92.24	92.24	92.21	92.21	92.21	92.21	92.21	92.21	92.22	92.21	92.24	92.24	92.24	92.23	92.26	92.18	92.18	92.19	92.19	92.19	92.19	92.22	92.24	92.21
ZOMB42	94.88	92.16	92.2	92.2	92.2	92.2	92.21	92.18	92.18	92.21	92.21	92.21	92.21	92.21	92.15	92.16	92.16	92.16	92.16	92.16	92.16	92.16	92.16	92.16	92.17	92.24	92.22	92.2	92.2	92.2	92.2	92.2	92.2	92.21	92.2	92.23	92.22	92.22	92.22	92.25	92.17	92.17	92.18	92.18	92.18	92.18	92.21	92.23	92.2
VOLO8.21	94.9	92.18	92.22	92.22	92.22	92.22	92.22	92.22	92.22	92.25	92.25	92.25	92.25	92.24	92.19	92.19	92.19	92.19	92.19	92.19	92.19	92.19	92.19	92.19	92.2	92.28	92.27	92.25	92.25	92.25	92.24	92.25	92.24	92.25	92.25	92.28	92.27	92.27	92.26	92.29	92.21	92.21	92.22	92.21	92.21	92.21	92.25	92.28	92.25
ZOMB26	94.88	92.24	92.28	92.27	92.28	92.27	92.27	92.27	92.27	92.3	92.3	92.3	92.3	92.3	92.24	92.25	92.25	92.25	92.25	92.25	92.25	92.25	92.25	92.25	92.26	92.33	92.33	92.3	92.3	92.3	92.3	92.3	92.3	92.31	92.3	92.33	92.33	92.33	92.32	92.35	92.28	92.27	92.28	92.27	92.27	92.27	92.31	92.33	92.3
BEZ17	94.88	92.17	92.21	92.21	92.21	92.21	92.21	92.19	92.19	92.22	92.22	92.22	92.22	92.21	92.16	92.17	92.17	92.17	92.17	92.17	92.17	92.17	92.17	92.17	92.18	92.25	92.23	92.2	92.2	92.2	92.2	92.2	92.2	92.21	92.2	92.23	92.23	92.23	92.22	92.25	92.18	92.17	92.18	92.19	92.19	92.19	92.21	92.23	92.2
BEZ2	94.92	92.17	92.21	92.21	92.21	92.21	92.22	92.19	92.2	92.23	92.23	92.23	92.23	92.23	92.17	92.17	92.17	92.17	92.17	92.17	92.17	92.17	92.17	92.17	92.18	92.24	92.23	92.21	92.21	92.21	92.2	92.21	92.2	92.21	92.21	92.24	92.23	92.23	92.23	92.26	92.18	92.18	92.19	92.19	92.19	92.19	92.22	92.24	92.21
HAZO5.1	94.91	92.21	92.25	92.25	92.25	92.25	92.24	92.24	92.25	92.27	92.27	92.27	92.27	92.27	92.21	92.22	92.22	92.22	92.22	92.22	92.22	92.22	92.22	92.22	92.23	92.3	92.3	92.27	92.27	92.27	92.27	92.27	92.27	92.28	92.27	92.3	92.3	92.3	92.29	92.31	92.25	92.25	92.25	92.23	92.23	92.23	92.28	92.3	92.27
PET3	94.86	92.18	92.22	92.22	92.22	92.22	92.22	92.21	92.21	92.24	92.24	92.24	92.24	92.23	92.18	92.18	92.18	92.18	92.18	92.18	92.18	92.18	92.18	92.18	92.19	92.26	92.26	92.24	92.24	92.24	92.23	92.24	92.23	92.24	92.24	92.27	92.26	92.26	92.25	92.29	92.21	92.21	92.22	92.21	92.21	92.21	92.25	92.27	92.24
PET6	94.89	92.19	92.23	92.22	92.23	92.22	92.22	92.21	92.21	92.25	92.25	92.25	92.25	92.23	92.18	92.18	92.19	92.18	92.18	92.18	92.18	92.18	92.18	92.18	92.2	92.26	92.26	92.24	92.24	92.24	92.24	92.24	92.24	92.25	92.24	92.27	92.26	92.26	92.26	92.29	92.21	92.21	92.22	92.21	92.21	92.21	92.25	92.27	92.24
PET4	94.86	92.18	92.22	92.22	92.22	92.22	92.22	92.21	92.21	92.24	92.24	92.24	92.24	92.23	92.18	92.18	92.18	92.18	92.18	92.18	92.18	92.18	92.18	92.18	92.19	92.26	92.26	92.24	92.24	92.24	92.23	92.24	92.23	92.24	92.24	92.27	92.26	92.26	92.25	92.29	92.21	92.21	92.22	92.21	92.21	92.21	92.25	92.27	92.24
LAH8.9	94.86	92.16	92.2	92.2	92.2	92.2	92.19	92.19	92.2	92.22	92.22	92.22	92.22	92.22	92.16	92.17	92.17	92.17	92.17	92.17	92.17	92.17	92.17	92.17	92.18	92.25	92.25	92.22	92.22	92.22	92.22	92.22	92.22	92.23	92.22	92.25	92.25	92.25	92.24	92.27	92.2	92.2	92.21	92.19	92.19	92.19	92.23	92.25	92.22
AND91	94.88	92.15	92.19	92.18	92.19	92.18	92.17	92.18	92.18	92.25	92.25	92.25	92.25	92.23	92.18	92.18	92.18	92.18	92.18	92.18	92.18	92.18	92.18	92.18	92.19	92.25	92.27	92.25	92.25	92.25	92.25	92.25	92.25	92.25	92.25	92.28	92.26	92.26	92.25	92.29	92.21	92.21	92.22	92.21	92.21	92.21	92.25	92.28	92.25
HAZO5.3	94.88	92.14	92.18	92.18	92.18	92.18	92.16	92.17	92.18	92.24	92.24	92.24	92.24	92.22	92.17	92.17	92.18	92.17	92.17	92.17	92.17	92.17	92.17	92.17	92.19	92.24	92.27	92.24	92.24	92.24	92.24	92.24	92.24	92.25	92.24	92.27	92.25	92.25	92.25	92.28	92.21	92.2	92.21	92.2	92.2	92.2	92.24	92.27	92.24
HAZO5.13	94.88	92.15	92.19	92.18	92.19	92.18	92.17	92.18	92.18	92.25	92.25	92.25	92.25	92.23	92.18	92.18	92.18	92.18	92.18	92.18	92.18	92.18	92.18	92.18	92.19	92.25	92.27	92.25	92.25	92.25	92.25	92.25	92.25	92.25	92.25	92.28	92.26	92.26	92.25	92.29	92.21	92.21	92.22	92.21	92.21	92.21	92.25	92.28	92.25
SANDRY8.1	94.89	92.16	92.2	92.2	92.2	92.2	92.18	92.19	92.2	92.26	92.26	92.26	92.26	92.24	92.19	92.19	92.2	92.19	92.19	92.19	92.19	92.19	92.19	92.19	92.2	92.26	92.28	92.26	92.26	92.26	92.26	92.26	92.26	92.27	92.26	92.29	92.27	92.27	92.27	92.3	92.22	92.22	92.23	92.22	92.22	92.22	92.26	92.29	92.26
GNISA8.10	94.88	92.18	92.22	92.21	92.22	92.21	92.17	92.17	92.18	92.24	92.24	92.24	92.24	92.22	92.17	92.17	92.18	92.17	92.17	92.17	92.17	92.17	92.17	92.17	92.19	92.24	92.25	92.23	92.23	92.23	92.23	92.23	92.23	92.24	92.23	92.26	92.24	92.24	92.24	92.27	92.19	92.19	92.2	92.2	92.2	92.2	92.23	92.26	92.23
LAH8.31	94.88	92.18	92.22	92.22	92.22	92.22	92.18	92.18	92.18	92.24	92.24	92.24	92.24	92.23	92.17	92.18	92.18	92.18	92.18	92.18	92.18	92.18	92.18	92.18	92.19	92.24	92.26	92.23	92.23	92.23	92.23	92.23	92.23	92.24	92.23	92.26	92.24	92.24	92.24	92.27	92.19	92.19	92.2	92.2	92.2	92.2	92.23	92.26	92.23
BAS16	94.89	92.16	92.2	92.2	92.2	92.2	92.17	92.18	92.18	92.24	92.24	92.24	92.24	92.23	92.18	92.18	92.18	92.18	92.18	92.18	92.18	92.18	92.18	92.18	92.19	92.25	92.25	92.23	92.23	92.23	92.23	92.23	92.23	92.24	92.23	92.26	92.24	92.24	92.24	92.27	92.19	92.19	92.2	92.21	92.21	92.21	92.23	92.26	92.23
SANDRY8.2	94.89	92.14	92.18	92.18	92.18	92.18	92.16	92.18	92.18	92.24	92.24	92.24	92.24	92.23	92.17	92.18	92.18	92.18	92.18	92.18	92.18	92.18	92.18	92.18	92.19	92.24	92.27	92.24	92.24	92.24	92.24	92.24	92.24	92.25	92.24	92.28	92.26	92.26	92.25	92.28	92.21	92.2	92.21	92.2	92.2	92.2	92.24	92.28	92.24
KMTEA7.12	94.96	92.24	92.28	92.28	92.28	92.28	92.24	92.28	92.28	92.31	92.31	92.31	92.31	92.31	92.25	92.25	92.26	92.25	92.25	92.25	92.25	92.25	92.25	92.25	92.27	92.33	92.35	92.32	92.32	92.32	92.32	92.32	92.32	92.33	92.32	92.35	92.36	92.36	92.35	92.37	92.3	92.29	92.3	92.28	92.28	92.28	92.33	92.35	92.32
KIR6.15	94.93	92.21	92.25	92.25	92.25	92.25	92.22	92.24	92.24	92.29	92.29	92.29	92.29	92.27	92.23	92.24	92.24	92.24	92.24	92.24	92.24	92.24	92.24	92.24	92.25	92.29	92.28	92.25	92.25	92.25	92.25	92.25	92.25	92.26	92.25	92.29	92.28	92.28	92.29	92.3	92.24	92.24	92.25	92.26	92.26	92.26	92.26	92.29	92.25
KIR6.18	94.93	92.17	92.21	92.21	92.21	92.21	92.18	92.19	92.2	92.25	92.25	92.25	92.25	92.24	92.19	92.19	92.2	92.19	92.19	92.19	92.19	92.19	92.19	92.19	92.21	92.26	92.29	92.26	92.26	92.26	92.26	92.26	92.26	92.27	92.26	92.29	92.27	92.27	92.28	92.3	92.24	92.23	92.24	92.22	92.22	92.22	92.26	92.29	92.26
MOR143	94.91	92.16	92.2	92.2	92.2	92.2	92.17	92.18	92.18	92.24	92.24	92.24	92.24	92.23	92.18	92.18	92.18	92.18	92.18	92.18	92.18	92.18	92.18	92.18	92.19	92.25	92.27	92.25	92.25	92.25	92.24	92.25	92.24	92.25	92.25	92.28	92.26	92.26	92.27	92.28	92.22	92.22	92.23	92.2	92.2	92.2	92.24	92.28	92.25
KMTEA7.3	94.92	92.23	92.27	92.27	92.27	92.27	92.23	92.24	92.25	92.3	92.3	92.3	92.3	92.28	92.23	92.23	92.23	92.23	92.23	92.23	92.23	92.23	92.23	92.23	92.24	92.3	92.3	92.27	92.27	92.27	92.27	92.27	92.27	92.28	92.27	92.31	92.29	92.29	92.29	92.31	92.23	92.23	92.24	92.26	92.26	92.26	92.27	92.31	92.27
KMTEA7.7	94.92	92.19	92.23	92.23	92.23	92.23	92.21	92.23	92.23	92.28	92.28	92.28	92.28	92.26	92.21	92.21	92.22	92.21	92.21	92.21	92.21	92.21	92.21	92.21	92.23	92.27	92.28	92.26	92.26	92.26	92.25	92.26	92.25	92.26	92.26	92.29	92.27	92.26	92.28	92.29	92.21	92.21	92.22	92.23	92.23	92.23	92.25	92.29	92.26
KMTEA7.8	94.9	92.17	92.21	92.21	92.21	92.21	92.19	92.21	92.21	92.25	92.25	92.25	92.25	92.24	92.19	92.19	92.2	92.19	92.19	92.19	92.19	92.19	92.19	92.19	92.21	92.25	92.26	92.24	92.24	92.24	92.23	92.24	92.23	92.24	92.24	92.27	92.25	92.24	92.25	92.27	92.19	92.19	92.2	92.21	92.21	92.21	92.23	92.27	92.24
LAVA19	94.93	92.2	92.24	92.23	92.24	92.23	92.22	92.23	92.23	92.27	92.27	92.27	92.27	92.25	92.2	92.21	92.21	92.21	92.21	92.21	92.21	92.21	92.21	92.21	92.22	92.29	92.29	92.26	92.26	92.26	92.26	92.26	92.26	92.27	92.26	92.29	92.29	92.27	92.29	92.31	92.23	92.23	92.24	92.22	92.22	92.22	92.27	92.29	92.26
ZOMB5	94.82	92.16	92.2	92.2	92.2	92.2	92.18	92.19	92.2	92.24	92.24	92.24	92.24	92.23	92.18	92.18	92.18	92.18	92.18	92.18	92.18	92.18	92.18	92.18	92.19	92.24	92.25	92.22	92.22	92.22	92.22	92.22	92.22	92.23	92.22	92.26	92.25	92.25	92.26	92.27	92.19	92.18	92.19	92.21	92.21	92.21	92.23	92.26	92.22
ZOMB7	94.87	92.18	92.22	92.22	92.22	92.22	92.2	92.21	92.22	92.26	92.26	92.26	92.26	92.25	92.2	92.2	92.2	92.2	92.2	92.2	92.2	92.2	92.2	92.2	92.21	92.26	92.27	92.24	92.24	92.24	92.24	92.24	92.24	92.25	92.24	92.27	92.27	92.27	92.27	92.29	92.21	92.2	92.21	92.22	92.22	92.22	92.25	92.27	92.24
MOR68	94.92	92.17	92.21	92.21	92.21	92.21	92.19	92.2	92.21	92.24	92.24	92.24	92.24	92.23	92.19	92.2	92.2	92.2	92.2	92.2	92.2	92.2	92.2	92.2	92.21	92.25	92.25	92.23	92.23	92.23	92.23	92.23	92.23	92.24	92.23	92.26	92.25	92.25	92.26	92.28	92.22	92.21	92.22	92.22	92.22	92.22	92.24	92.26	92.23
BEMA21	94.8	92.11	92.15	92.15	92.15	92.15	92.13	92.14	92.15	92.19	92.19	92.19	92.19	92.18	92.13	92.13	92.13	92.13	92.13	92.13	92.13	92.13	92.13	92.13	92.14	92.19	92.22	92.19	92.19	92.19	92.19	92.19	92.19	92.2	92.19	92.22	92.22	92.21	92.22	92.24	92.16	92.15	92.16	92.14	92.14	92.14	92.2	92.22	92.19
KIBO28	94.75	92.07	92.11	92.11	92.11	92.11	92.11	92.12	92.12	92.15	92.15	92.15	92.15	92.15	92.1	92.11	92.11	92.11	92.11	92.11	92.11	92.11	92.11	92.11	92.12	92.15	92.17	92.15	92.15	92.15	92.14	92.15	92.14	92.15	92.15	92.18	92.18	92.17	92.19	92.21	92.13	92.13	92.14	92.12	92.12	92.12	92.17	92.18	92.15
BEMA25	94.77	92.2	92.24	92.24	92.24	92.24	92.24	92.25	92.25	92.26	92.26	92.26	92.26	92.26	92.2	92.2	92.2	92.2	92.2	92.2	92.2	92.2	92.2	92.2	92.21	92.28	92.32	92.3	92.3	92.3	92.3	92.3	92.29	92.3	92.3	92.33	92.31	92.3	92.32	92.34	92.27	92.27	92.28	92.24	92.24	92.24	92.3	92.33	92.3
KIBO3	94.82	92.11	92.15	92.15	92.15	92.15	92.12	92.16	92.16	92.18	92.18	92.18	92.18	92.17	92.12	92.12	92.12	92.12	92.12	92.12	92.12	92.12	92.12	92.12	92.13	92.19	92.24	92.21	92.21	92.21	92.21	92.21	92.21	92.22	92.21	92.24	92.24	92.22	92.24	92.26	92.2	92.2	92.21	92.13	92.13	92.13	92.22	92.24	92.21
MIT5	94.82	92.12	92.16	92.15	92.16	92.15	92.13	92.16	92.17	92.19	92.19	92.19	92.19	92.17	92.12	92.13	92.13	92.13	92.13	92.13	92.13	92.13	92.13	92.13	92.14	92.19	92.24	92.22	92.22	92.22	92.22	92.22	92.21	92.22	92.22	92.25	92.24	92.23	92.25	92.27	92.21	92.2	92.21	92.14	92.14	92.14	92.23	92.25	92.22
KIBO6	94.8	92.12	92.16	92.16	92.16	92.16	92.13	92.16	92.16	92.19	92.19	92.19	92.19	92.18	92.13	92.13	92.14	92.13	92.13	92.13	92.13	92.13	92.13	92.13	92.14	92.21	92.25	92.22	92.22	92.22	92.22	92.22	92.22	92.23	92.22	92.26	92.25	92.24	92.26	92.27	92.21	92.21	92.22	92.14	92.14	92.14	92.23	92.26	92.22
JAM4.3	94.87	92.13	92.17	92.17	92.17	92.17	92.15	92.18	92.18	92.23	92.23	92.23	92.23	92.2	92.13	92.14	92.14	92.14	92.14	92.14	92.14	92.14	92.14	92.14	92.15	92.22	92.26	92.24	92.24	92.24	92.23	92.24	92.25	92.24	92.24	92.27	92.26	92.26	92.27	92.29	92.21	92.21	92.22	92.18	92.18	92.18	92.25	92.27	92.24
JAM4.14	94.86	92.12	92.16	92.15	92.16	92.15	92.14	92.16	92.17	92.23	92.23	92.23	92.23	92.19	92.12	92.13	92.13	92.13	92.13	92.13	92.13	92.13	92.13	92.13	92.14	92.21	92.25	92.23	92.23	92.23	92.22	92.23	92.23	92.23	92.23	92.26	92.25	92.25	92.26	92.27	92.2	92.2	92.21	92.16	92.16	92.16	92.23	92.26	92.23
JAM4.15	94.8	92.13	92.17	92.17	92.17	92.17	92.17	92.19	92.19	92.23	92.23	92.23	92.23	92.22	92.15	92.15	92.16	92.15	92.15	92.15	92.15	92.15	92.15	92.15	92.17	92.22	92.25	92.23	92.23	92.23	92.22	92.23	92.24	92.23	92.23	92.26	92.26	92.26	92.27	92.29	92.19	92.19	92.2	92.19	92.19	92.19	92.25	92.26	92.23
ANK6	99.71	92.44	92.48	92.48	92.48	92.48	92.4	92.43	92.43	92.51	92.51	92.51	92.51	92.49	92.45	92.45	92.46	92.45	92.45	92.45	92.46	92.45	92.45	92.45	92.48	92.43	92.45	92.44	92.44	92.44	92.44	92.44	92.44	92.44	92.44	92.46	92.42	92.42	92.41	92.41	92.35	92.35	92.36	92.44	92.44	92.44	92.41	92.46	92.44
ANK19	99.71	92.44	92.48	92.48	92.48	92.48	92.4	92.43	92.43	92.51	92.51	92.51	92.51	92.49	92.45	92.45	92.46	92.45	92.45	92.45	92.46	92.45	92.45	92.45	92.48	92.43	92.45	92.44	92.44	92.44	92.44	92.44	92.44	92.44	92.44	92.46	92.42	92.42	92.41	92.41	92.35	92.35	92.36	92.44	92.44	92.44	92.41	92.46	92.44
BOR22	99.68	92.44	92.48	92.48	92.48	92.48	92.41	92.44	92.44	92.49	92.49	92.49	92.49	92.49	92.45	92.45	92.46	92.45	92.45	92.45	92.46	92.45	92.45	92.45	92.48	92.44	92.45	92.44	92.44	92.44	92.44	92.44	92.44	92.44	92.44	92.46	92.43	92.43	92.42	92.43	92.35	92.35	92.36	92.44	92.44	92.44	92.42	92.46	92.44
HIH30	99.68	92.44	92.48	92.48	92.48	92.48	92.41	92.44	92.44	92.49	92.49	92.49	92.49	92.49	92.45	92.45	92.46	92.45	92.45	92.45	92.46	92.45	92.45	92.45	92.48	92.44	92.45	92.44	92.44	92.44	92.44	92.44	92.44	92.44	92.44	92.46	92.43	92.43	92.42	92.43	92.35	92.35	92.36	92.44	92.44	92.44	92.42	92.46	92.44
HIH1	99.67	92.44	92.48	92.47	92.48	92.47	92.41	92.43	92.44	92.49	92.49	92.49	92.49	92.49	92.44	92.44	92.45	92.44	92.44	92.44	92.45	92.44	92.44	92.44	92.47	92.43	92.44	92.43	92.43	92.43	92.43	92.43	92.43	92.44	92.43	92.45	92.43	92.43	92.41	92.42	92.35	92.34	92.35	92.43	92.43	92.43	92.42	92.45	92.43
BOR4	99.68	92.41	92.45	92.45	92.45	92.45	92.37	92.4	92.4	92.48	92.48	92.48	92.48	92.46	92.4	92.41	92.42	92.41	92.41	92.41	92.41	92.41	92.41	92.41	92.44	92.41	92.43	92.42	92.42	92.42	92.42	92.42	92.42	92.43	92.42	92.44	92.4	92.4	92.39	92.4	92.33	92.33	92.34	92.41	92.41	92.41	92.39	92.44	92.42
BOR13	99.68	92.41	92.45	92.45	92.45	92.45	92.37	92.4	92.4	92.48	92.48	92.48	92.48	92.46	92.4	92.41	92.42	92.41	92.41	92.41	92.41	92.41	92.41	92.41	92.44	92.41	92.43	92.42	92.42	92.42	92.42	92.42	92.42	92.43	92.42	92.44	92.4	92.4	92.39	92.4	92.33	92.33	92.34	92.41	92.41	92.41	92.39	92.44	92.42
HIH35	99.68	92.41	92.45	92.45	92.45	92.45	92.37	92.4	92.4	92.48	92.48	92.48	92.48	92.46	92.4	92.41	92.42	92.41	92.41	92.41	92.41	92.41	92.41	92.41	92.44	92.41	92.43	92.42	92.42	92.42	92.42	92.42	92.42	92.43	92.42	92.44	92.4	92.4	92.39	92.4	92.33	92.33	92.34	92.41	92.41	92.41	92.39	92.44	92.42
HIH16	99.68	92.41	92.45	92.45	92.45	92.45	92.37	92.4	92.4	92.48	92.48	92.48	92.48	92.46	92.4	92.41	92.42	92.41	92.41	92.41	92.41	92.41	92.41	92.41	92.44	92.41	92.43	92.42	92.42	92.42	92.42	92.42	92.42	92.43	92.42	92.44	92.4	92.4	92.39	92.4	92.33	92.33	92.34	92.41	92.41	92.41	92.39	92.44	92.42
ANK46	99.95	92.42	92.46	92.45	92.46	92.46	92.39	92.42	92.42	92.49	92.49	92.49	92.49	92.47	92.45	92.45	92.46	92.45	92.45	92.45	92.46	92.45	92.45	92.45	92.46	92.4	92.42	92.41	92.41	92.41	92.41	92.41	92.41	92.42	92.41	92.43	92.42	92.42	92.4	92.41	92.35	92.34	92.35	92.43	92.43	92.43	92.41	92.43	92.41
MAR.6	99.94	92.42	92.46	92.46	92.46	92.46	92.4	92.42	92.42	92.49	92.49	92.49	92.49	92.48	92.45	92.46	92.47	92.46	92.46	92.46	92.46	92.46	92.46	92.46	92.47	92.41	92.43	92.41	92.41	92.41	92.41	92.41	92.41	92.42	92.41	92.43	92.42	92.42	92.41	92.41	92.35	92.35	92.36	92.43	92.43	92.43	92.41	92.43	92.41
9-Mar	99.64	92.43	92.47	92.47	92.47	92.47	92.4	92.43	92.43	92.49	92.49	92.49	92.49	92.48	92.44	92.44	92.45	92.44	92.44	92.44	92.45	92.44	92.44	92.44	92.46	92.4	92.37	92.35	92.35	92.35	92.35	92.35	92.36	92.37	92.35	92.37	92.37	92.37	92.36	92.37	92.28	92.28	92.29	92.43	92.43	92.43	92.36	92.37	92.35
MAR.39	99.68	92.42	92.46	92.45	92.46	92.45	92.39	92.41	92.42	92.48	92.48	92.48	92.48	92.47	92.42	92.43	92.44	92.43	92.43	92.43	92.43	92.43	92.43	92.43	92.45	92.4	92.37	92.36	92.36	92.36	92.36	92.36	92.37	92.38	92.36	92.38	92.38	92.38	92.36	92.37	92.29	92.28	92.29	92.41	92.41	92.41	92.37	92.38	92.36
ANK48	99.59	92.38	92.42	92.42	92.42	92.42	92.36	92.37	92.37	92.44	92.44	92.44	92.44	92.42	92.39	92.39	92.4	92.39	92.39	92.39	92.4	92.39	92.39	92.39	92.42	92.37	92.39	92.37	92.37	92.37	92.37	92.37	92.37	92.38	92.37	92.39	92.37	92.37	92.36	92.36	92.31	92.31	92.32	92.39	92.39	92.39	92.36	92.39	92.37
BIN6.6	98.87	92.36	92.4	92.4	92.4	92.4	92.35	92.36	92.36	92.45	92.45	92.45	92.45	92.45	92.39	92.4	92.4	92.4	92.4	92.4	92.4	92.4	92.4	92.4	92.43	92.31	92.38	92.37	92.37	92.37	92.36	92.37	92.36	92.37	92.37	92.38	92.37	92.37	92.36	92.37	92.3	92.29	92.3	92.38	92.38	92.38	92.36	92.38	92.37
TAT19	98.87	92.36	92.4	92.4	92.4	92.4	92.35	92.36	92.36	92.45	92.45	92.45	92.45	92.45	92.39	92.4	92.4	92.4	92.4	92.4	92.4	92.4	92.4	92.4	92.43	92.31	92.38	92.37	92.37	92.37	92.36	92.37	92.36	92.37	92.37	92.38	92.37	92.37	92.36	92.37	92.3	92.29	92.3	92.38	92.38	92.38	92.36	92.38	92.37
DAR4.4	98.87	92.36	92.4	92.4	92.4	92.4	92.35	92.36	92.36	92.45	92.45	92.45	92.45	92.45	92.39	92.4	92.4	92.4	92.4	92.4	92.4	92.4	92.4	92.4	92.43	92.31	92.38	92.37	92.37	92.37	92.36	92.37	92.36	92.37	92.37	92.38	92.37	92.37	92.36	92.37	92.3	92.29	92.3	92.38	92.38	92.38	92.36	92.38	92.37
DAR4.8	98.87	92.36	92.4	92.4	92.4	92.4	92.35	92.36	92.36	92.45	92.45	92.45	92.45	92.45	92.39	92.4	92.4	92.4	92.4	92.4	92.4	92.4	92.4	92.4	92.43	92.31	92.38	92.37	92.37	92.37	92.36	92.37	92.36	92.37	92.37	92.38	92.37	92.37	92.36	92.37	92.3	92.29	92.3	92.38	92.38	92.38	92.36	92.38	92.37
DAR4.38	98.87	92.36	92.4	92.4	92.4	92.4	92.35	92.36	92.36	92.45	92.45	92.45	92.45	92.45	92.39	92.4	92.4	92.4	92.4	92.4	92.4	92.4	92.4	92.4	92.43	92.31	92.38	92.37	92.37	92.37	92.36	92.37	92.36	92.37	92.37	92.38	92.37	92.37	92.36	92.37	92.3	92.29	92.3	92.38	92.38	92.38	92.36	92.38	92.37
NDR6.6	98.87	92.36	92.4	92.4	92.4	92.4	92.35	92.36	92.36	92.45	92.45	92.45	92.45	92.45	92.39	92.4	92.4	92.4	92.4	92.4	92.4	92.4	92.4	92.4	92.43	92.31	92.38	92.37	92.37	92.37	92.36	92.37	92.36	92.37	92.37	92.39	92.37	92.37	92.36	92.37	92.3	92.3	92.31	92.39	92.39	92.39	92.36	92.39	92.37
DAR4.20	98.87	92.36	92.4	92.4	92.4	92.4	92.35	92.36	92.36	92.45	92.45	92.45	92.45	92.45	92.39	92.4	92.4	92.4	92.4	92.4	92.4	92.4	92.4	92.4	92.43	92.31	92.38	92.37	92.37	92.37	92.36	92.37	92.36	92.37	92.37	92.38	92.37	92.37	92.36	92.37	92.3	92.29	92.3	92.38	92.38	92.38	92.36	92.38	92.37
NDR6.8	98.87	92.36	92.4	92.4	92.4	92.4	92.35	92.36	92.36	92.45	92.45	92.45	92.45	92.45	92.39	92.4	92.4	92.4	92.4	92.4	92.4	92.4	92.4	92.4	92.43	92.31	92.38	92.37	92.37	92.37	92.36	92.37	92.36	92.37	92.37	92.38	92.37	92.37	92.36	92.37	92.3	92.29	92.3	92.38	92.38	92.38	92.36	92.38	92.37
TAT15	98.85	92.35	92.39	92.39	92.39	92.39	92.34	92.35	92.35	92.44	92.44	92.44	92.44	92.44	92.38	92.39	92.39	92.39	92.39	92.39	92.39	92.39	92.39	92.39	92.42	92.3	92.37	92.36	92.36	92.36	92.35	92.36	92.35	92.36	92.36	92.37	92.36	92.36	92.35	92.36	92.29	92.29	92.29	92.37	92.37	92.37	92.35	92.37	92.36
BIN6.8	98.89	92.33	92.37	92.37	92.37	92.37	92.29	92.31	92.31	92.41	92.41	92.41	92.41	92.4	92.35	92.36	92.36	92.36	92.36	92.36	92.36	92.36	92.36	92.36	92.39	92.28	92.33	92.32	92.32	92.32	92.32	92.32	92.32	92.33	92.32	92.34	92.33	92.33	92.31	92.32	92.25	92.24	92.25	92.34	92.34	92.34	92.32	92.34	92.32
BIN6.9	98.92	92.36	92.4	92.39	92.4	92.39	92.32	92.33	92.33	92.44	92.44	92.44	92.44	92.42	92.37	92.38	92.38	92.38	92.38	92.38	92.38	92.38	92.38	92.38	92.41	92.3	92.36	92.35	92.35	92.35	92.34	92.35	92.34	92.35	92.35	92.37	92.35	92.35	92.34	92.35	92.28	92.28	92.29	92.37	92.37	92.37	92.34	92.37	92.35
NDR6.3	98.92	92.36	92.4	92.39	92.4	92.39	92.32	92.33	92.33	92.44	92.44	92.44	92.44	92.42	92.37	92.38	92.38	92.38	92.38	92.38	92.38	92.38	92.38	92.38	92.41	92.3	92.36	92.35	92.35	92.35	92.34	92.35	92.34	92.35	92.35	92.37	92.35	92.35	92.34	92.35	92.28	92.28	92.29	92.37	92.37	92.37	92.34	92.37	92.35
NOFY6.2	98.92	92.36	92.4	92.39	92.4	92.39	92.32	92.33	92.33	92.44	92.44	92.44	92.44	92.42	92.37	92.38	92.38	92.38	92.38	92.38	92.38	92.38	92.38	92.38	92.41	92.3	92.36	92.35	92.35	92.35	92.34	92.35	92.34	92.35	92.35	92.37	92.35	92.35	92.34	92.35	92.28	92.28	92.29	92.37	92.37	92.37	92.34	92.37	92.35
NOFY6.5	98.92	92.36	92.4	92.39	92.4	92.39	92.32	92.33	92.33	92.44	92.44	92.44	92.44	92.42	92.37	92.38	92.38	92.38	92.38	92.38	92.38	92.38	92.38	92.38	92.41	92.3	92.36	92.35	92.35	92.35	92.34	92.35	92.34	92.35	92.35	92.37	92.35	92.35	92.34	92.35	92.28	92.28	92.29	92.37	92.37	92.37	92.34	92.37	92.35
NOFY6.8	98.92	92.36	92.4	92.39	92.4	92.39	92.32	92.33	92.33	92.44	92.44	92.44	92.44	92.42	92.37	92.38	92.38	92.38	92.38	92.38	92.38	92.38	92.38	92.38	92.41	92.3	92.36	92.35	92.35	92.35	92.34	92.35	92.34	92.35	92.35	92.37	92.35	92.35	92.34	92.35	92.28	92.28	92.29	92.37	92.37	92.37	92.34	92.37	92.35
TSIM6.9	98.92	92.36	92.4	92.39	92.4	92.39	92.32	92.33	92.33	92.44	92.44	92.44	92.44	92.42	92.37	92.38	92.38	92.38	92.38	92.38	92.38	92.38	92.38	92.38	92.41	92.3	92.36	92.35	92.35	92.35	92.34	92.35	92.34	92.35	92.35	92.36	92.35	92.35	92.34	92.35	92.28	92.28	92.29	92.36	92.36	92.36	92.34	92.36	92.35
NOFY6.6	98.92	92.36	92.4	92.39	92.4	92.39	92.32	92.33	92.33	92.44	92.44	92.44	92.44	92.42	92.37	92.38	92.38	92.38	92.38	92.38	92.38	92.38	92.38	92.38	92.41	92.3	92.36	92.35	92.35	92.35	92.34	92.35	92.34	92.35	92.35	92.37	92.35	92.35	92.34	92.35	92.28	92.28	92.29	92.37	92.37	92.37	92.34	92.37	92.35
KC757387	84.16	84.04	84.09	84.08	84.09	84.09	84.07	84.08	84.09	84.13	84.13	84.13	84.13	84.04	84.08	84.09	84.08	84.09	84.09	84.09	84.08	84.09	84.09	84.09	84.09	84.1	83.97	83.96	83.96	83.94	83.94	83.94	83.96	83.94	83.94	83.96	83.96	83.96	83.95	83.99	83.99	83.98	83.99	84.04	84.04	84.04	83.95	83.96	83.96
[truncated: 123 more columns]
