# Supplementary material for: Nuclear and Mitochondrial Phylogenomics of the Sifakas Reveal Cryptic Variation in the Diademed Sifaka
Source: Genes (Basel). 2022 Jun 7;13(6):1026. doi: 10.3390/genes13061026 (PMC9223071; doi:10.3390/genes13061026)
Supplement: Supplementary file 1 [file genes-13-01026-s001.zip › Supplementary Table S8_ModelParamsENM.xlsx]

## Sheet: Sheet1
Supplementary Table S8: Model parameters and evaluation metrics.
	Model parameters and evaluation metrics. AUC values range from 0-1, with AUC = 0.5 indicating no predictive ability and higher AUC values indicating better predictive accuracy.
	Species	Feature classes	Regularization multiplier	Average AUC
	test value	Tenth percentile omission rate
	P. edwardsi	H	4	0.98	0.08
	P. diadema blue clade 5	LQH	4	0.85	0.25
	P. diadema purple clade 4	LQH	1	0.97	0.17
